# Supplementary material for: The bHLH family member ZmPTF1 regulates drought tolerance in maize by promoting root development and abscisic acid synthesis
Source: PubMed Central journal article supplement — J Exp Bot. 2019 Jul 2;70(19):5471–86. doi: 10.1093/jxb/erz307 (PMC6793450; doi:10.1093/jxb/erz307), 2019-07-02
Supplement: erz307_suppl_supplementary_tables_s1-s8.pdf [file erz307_suppl_supplementary_tables_s1-s8.pdf]

Table S1 Primers used in this paper

| Name                                     | ID_maize            | Forward primer SEQ             | Reverse primer SEQ            |
|------------------------------------------|---------------------|--------------------------------|-------------------------------|
| Primers used for real-time RT-PCR        |                     |                                |                               |
| ABA1                                     | GRMZM2G127139       | TCCCTCCGATGTCATTGAGT           | TGTGGCTGATGATAGTGGTG          |
| NPQ1                                     | GRMZM2G027219       | TGGGATGGTTATGGTGGTTC           | CCACAGGTGTTGTCGGTCAT          |
| AAO3                                     | GRMZM2G141473       | CCTTGGCATTCCATTCACA            | GCAACATTGGGCTCACATCC          |
| AAO3                                     | GRMZM2G141535       | CGCACTAGACACTAACACCG           | TTGGTCGAAGATTAACCTCATA        |
| AAO3                                     | GRMZM2G406830       | GTTGCACCGTCCTGTCCGTAT          | CCGCATCGCAGACTTTGTAG          |
| AAO3                                     | GRMZM2G019799       | TGAAGCACCCACATACACGC           | GCCCGAAGACTCACCTCATA          |
| AAO3                                     | GRMZM5G899851       | CTTTGAGACTTTCCGAGCAG           | AGGGAGGATAGGAAGGTAAACA        |
| ABA2                                     | GRMZM2G332976       | GCTCTGGGATTGGGAGGGAGTA         | GCAACGCTGTAGGACGAAATTGTA      |
| ABA2                                     | GRMZM2G069523       | GCGTTGGAGCAGGCAATGGA           | TACAAAGCCGGTGCCGGTGA          |
| NCED                                     | GRMZM2G150363       | AGGACGACGGCTACTTGGTG           | GTATCCAGCGCGTGTCTTCT          |
| NCED                                     | GRMZM2G417954       | TGTCGTGTCCAAGCCGTTCTT          | CGGGATGATGGCGTGGTTCT          |
| NCED                                     | GRMZM2G014392       | CGGAGGAGGAACAGAGGAGCCA         | GCAACCAAGATCCCAGACACCC        |
| NCED                                     | GRMZM5G838285       | CCCACCATGATCCACGACTTCGC        | CGTCTTCTCCCTGTCCAGCACCC       |
| ZmPTF1                                   | GRMZM2G024530       | TCAACTTCTGTGCTGCTCAA           | GCAGCAGCATGTCTTTATTT          |
| ZmPTF1-like                              | GRMZM2G116785       | ATCCTTCTGATGTACAAACT           | AGGCAGAGGTTGGCCGTGGTA         |
| ZmAct1                                   | GRMZM2G126010       | ATCACCATTGGGTCAGAAAGG          | GTGCTGAGAGAAGCCAAAATAGAG      |
| Primers used for Yeast-one-hybridization |                     |                                |                               |
| Pro_AZF2                                 | GRMZM2G113860       | acggtaccGCGTAGTTGGAGGCTGGTTT   | TGGCTAGCTGATCTGATGACGcagctgtg |
| Pro_NAC30                                | AC212859.3_FG008    | acggtaccTTCTACACAAGCCGGTCGTC   | GATCAGGGTCAGGGATCGGAcagctgtg  |
| Pro_ATAF2                                | GRMZM2G347043       | acggtaccAAAGATGTCAGTACCCGCCG   | TTAGCTCGGATCTGCGTGTGcagctgtg  |
| Pro_NCED9_1                              | GRMZM2G014392       | acggtaccCACGCGATAAATCCTGTGCC   | CATCGCGGTGACTGGAATTGcagctgtg  |
| Pro_NCED9_2                              | GRMZM2G417954       | acggtaccCCACCACTTTCCAAAGTTCAGA | GTCAGAGAGCTGGGGTTGTcagctgtg   |
| Pro_CBF4_1                               | GRMZM2G069082       | acggtaccCACAGGCACTGTCTGTCTT    | GGGTTCTTTGTCTCGGGATcagctgtg   |
| Pro_CBF4_2                               | GRMZM2G124037       | acggtaccAGCAAGACCCTCTCGCTACC   | GTGTGGTTTTGTGGGAGGTGcagctgtg  |
| Primers used for mutant genotyping       |                     |                                |                               |
| mu1046031                                | ptf1                | GCACTAGCCAGAAGAAGGCATAA        | AGGCCCTCAGCAAACATCAA          |
|                                          | TIRmix+3'-n(ptf1)   |                                | AAGCGTAATCGAAGTTCCAACAAT      |
| mu1030095&mu1040158                      | ptf2/3              | AGGCTCGTTCTCAAACCCAT           | CATCAATCAATCCCACCCAC          |
|                                          | TIRmix+3'-n(ptf2/3) |                                | GAGGAAACAGACTTGACGCT          |
|                                          | TIR8a               | CGCTCCATTTGTCGAATCCCCTS        |                               |
|                                          | TIR8b               | CGCTCCATTTGTCGAATCCSCTT        |                               |
| TIR Forward primer                       | TIR8c               | SGCTCCATTTGTCGAATCCCKT         |                               |
|                                          | TIR8d               | CGCTCCATTTGTCGAATCACCTC        |                               |

Table S1

Table S2 Sequences of probes and mutated probes used in electrophoretic mobility shift assay

| Gene ID        | Nam | Sequence of the probe (5' to 3')                 |
|----------------|-----|--------------------------------------------------|
| GRMZM2G11386   | F   | GAAGTCTAAATCCAGTGCACGCAGTAGCCCGTGCACCTTTGCCTCTA  |
| GRMZM2G11386   | R   | GCTTAGAGGCAAAGGTGCACGGGCTACTGCGTGCCTGGATTTAGAC   |
| GRMZM2G11386   | MF  | GAAGTCTAAATCCAACAACAGCAGTAGCCACACAACACTTTGCCTCTA |
| GRMZM2G11386   | MR  | GCTTAGAGGCAAAGTGTGTGGGCTACTGCTGTTGTTGGATTTAGAC   |
| AC212859.3_FG0 | F   | AGAAGTAGATGGCTGCGAATCCTCAAGTGCCTCAAAGAAACATGC    |
| AC212859.3_FG0 | R   | GCATGCATGTTTCTTTGAGTGCCTTGAGGATTCGCAGCCATCTACTT  |
| AC212859.3_FG0 | MF  | AGAAGTAGATGGCTGCGAATCCTCAAACAACATCAAAGAAACATGC   |
| AC212859.3_FG0 | MR  | GCATGCATGTTTCTTTGATGTTGTTGAGGATTCGCAGCCATCTACTT  |
| GRMZM2G34704   | F   | TCATCCAGCTGCCCCGCCCAACCACACGTGCCAATTCGGCTTTTCGGC |
| GRMZM2G34704   | R   | TGCGCGAAAGCGGAATTGGCAGGTGTGGTTGGGCGGGGGCAGCTGG   |
| GRMZM2G34704   | MF  | TCATCCAGCTGCCCCGCCCAACCAACAACCAATTCGGCTTTTCGGC   |
| GRMZM2G34704   | MR  | TGCGCGAAAGCGGAATTGGTGTGTTGGTTGGGCGGGGGCAGCTGGA   |
| GRMZM2G01439   | F   | GCCCCCGCAGCGCACACAGTGGGCGCCCCGTGTCGGCGTCGCGAATT  |
| GRMZM2G01439   | R   | ATGAATTCGCGACGCCGACAGGGGCGCCACGTGGTGCCTGCGGG     |
| GRMZM2G01439   | MF  | GCCCCCGCAGCGCACACAACAGGCGCCCCGTGTCGGCGTCGCGAATT  |
| GRMZM2G01439   | MR  | ATGAATTCGCGACGCCGACAGGGGCGCCTGTTGTGTGCGCTGCGGGG  |
| GRMZM2G41795   | F   | GAAGAGGACAGCCACAGACACGGCTGCAGTGCACGCGCGCGTCCC    |
| GRMZM2G41795   | R   | ACGGGGACGCGCCGCGTGCCTGCAGCCGTGTCTGTGGCTGTCTCT    |
| GRMZM2G41795   | MF  | GAAGAGGACAGCCACAGACACGGCTGCAACAACAGCGCGCGTCCC    |
| GRMZM2G41795   | MR  | ACGGGGACGCGCCGCGTGTGTTGCAGCCGTGTCTGTGGCTGTCTCTT  |
| GRMZM2G06908   | F   | GCCCATGTCCTCCACTGCAGTGCCTACAAAAACCACTGTCAATGTC   |
| GRMZM2G06908   | R   | CTTGACATTGACAGTGGTTTTTGTAGTGCCTGCAGTGGAGGACATG   |
| GRMZM2G06908   | MF  | GCCCATGTCCTCCACTGCAACAACATAAAAAACCACTGTCAATGTC   |
| GRMZM2G06908   | MR  | CTTGACATTGACAGTGGTTTTTGTATGTTGTTGCAGTGGAGGACATGG |
| GRMZM2G12403   | F   | CCTCCACTTCACTGCAGCTGCAGTGCACACCACTCTGTCTGTTTGTGA |
| GRMZM2G12403   | R   | CTTCACAAACAGACAGAGTGGTGTGCTGCAGTGCAGTGAAGTGG     |
| GRMZM2G12403   | MF  | CCTCCACTTCACTGCAGCTGCAACAACAACCACTCTGTCTGTTTGTGA |
| GRMZM2G12403   | MR  | CTTCACAAACAGACAGAGTGGTGTGTTGCTGCAGTGCAGTGAAGTGG  |

Table S2

**Table S3 GO enrichment analysis between the ZmPTF1 overexpression line (L+4) and WT**

| <b>GO term</b> | <b>Ontology</b> | <b>Description</b>                             | <b>Number in input list</b> | <b>Number in BG/Ref</b> | <b>p-value</b> | <b>FDR</b> |
|----------------|-----------------|------------------------------------------------|-----------------------------|-------------------------|----------------|------------|
| GO:0042221     | P               | response to chemical stimulus                  | 212                         | 3978                    | 1.50E-38       | 7.60E-35   |
| GO:0050896     | P               | response to stimulus                           | 276                         | 6292                    | 1.00E-37       | 2.60E-34   |
| GO:0010033     | P               | response to organic substance                  | 163                         | 2754                    | 1.80E-33       | 3.00E-30   |
| GO:0010200     | P               | response to chitin                             | 59                          | 421                     | 1.90E-28       | 2.40E-25   |
| GO:0006950     | P               | response to stress                             | 192                         | 4089                    | 2.10E-27       | 2.10E-24   |
| GO:0009743     | P               | response to carbohydrate stimulus              | 73                          | 812                     | 4.50E-24       | 3.80E-21   |
| GO:0009719     | P               | response to endogenous stimulus                | 105                         | 1615                    | 6.60E-24       | 4.70E-21   |
| GO:0009628     | P               | response to abiotic stimulus                   | 134                         | 2635                    | 2.90E-21       | 1.80E-18   |
| GO:0070887     | P               | cellular response to chemical stimulus         | 91                          | 1417                    | 2.30E-20       | 1.30E-17   |
| GO:0045087     | P               | innate immune response                         | 70                          | 930                     | 3.90E-19       | 1.90E-16   |
| GO:0044283     | P               | small molecule biosynthetic process            | 104                         | 1865                    | 5.00E-19       | 2.30E-16   |
| GO:0051716     | P               | cellular response to stimulus                  | 119                         | 2355                    | 1.40E-18       | 5.00E-16   |
| GO:0009607     | P               | response to biotic stimulus                    | 97                          | 1687                    | 1.40E-18       | 5.00E-16   |
| GO:0009725     | P               | response to hormone stimulus                   | 86                          | 1375                    | 1.40E-18       | 5.00E-16   |
| GO:0002376     | P               | immune system process                          | 71                          | 984                     | 1.80E-18       | 5.60E-16   |
| GO:0006955     | P               | immune response                                | 71                          | 984                     | 1.80E-18       | 5.60E-16   |
| GO:0071310     | P               | cellular response to organic substance         | 80                          | 1234                    | 3.70E-18       | 1.10E-15   |
| GO:0009737     | P               | response to abscisic acid stimulus             | 55                          | 621                     | 4.70E-18       | 1.30E-15   |
| GO:0046394     | P               | carboxylic acid biosynthetic process           | 73                          | 1116                    | 8.10E-17       | 2.00E-14   |
| GO:0016053     | P               | organic acid biosynthetic process              | 73                          | 1116                    | 8.10E-17       | 2.00E-14   |
| GO:0071495     | P               | cellular response to endogenous stimulus       | 61                          | 815                     | 1.10E-16       | 2.70E-14   |
| GO:0051707     | P               | response to other organism                     | 83                          | 1421                    | 2.60E-16       | 5.90E-14   |
| GO:0006811     | P               | ion transport                                  | 68                          | 1019                    | 4.10E-16       | 8.80E-14   |
| GO:0006952     | P               | defense response                               | 90                          | 1653                    | 7.00E-16       | 1.50E-13   |
| GO:0007242     | P               | intracellular signaling cascade                | 76                          | 1252                    | 8.00E-16       | 1.60E-13   |
| GO:0009611     | P               | response to wounding                           | 38                          | 340                     | 9.60E-16       | 1.90E-13   |
| GO:0009620     | P               | response to fungus                             | 45                          | 499                     | 3.10E-15       | 5.80E-13   |
| GO:0051704     | P               | multi-organism process                         | 93                          | 1820                    | 8.50E-15       | 1.50E-12   |
| GO:0009753     | P               | response to jasmonic acid stimulus             | 43                          | 471                     | 8.90E-15       | 1.50E-12   |
| GO:0006091     | P               | generation of precursor metabolites and energy | 54                          | 730                     | 1.10E-14       | 1.90E-12   |
| GO:0034641     | P               | cellular nitrogen compound metabolic process   | 77                          | 1373                    | 2.70E-14       | 4.40E-12   |
| GO:0009751     | P               | response to salicylic acid stimulus            | 42                          | 470                     | 3.60E-14       | 5.70E-12   |
| GO:0006812     | P               | cation transport                               | 56                          | 813                     | 5.80E-14       | 8.70E-12   |
| GO:0015979     | P               | photosynthesis                                 | 40                          | 435                     | 6.40E-14       | 9.40E-12   |
| GO:0009266     | P               | response to temperature stimulus               | 61                          | 962                     | 1.20E-13       | 1.70E-11   |
| GO:0043436     | P               | oxoacid metabolic process                      | 99                          | 2103                    | 1.30E-13       | 1.70E-11   |
| GO:0019752     | P               | carboxylic acid metabolic process              | 99                          | 2103                    | 1.30E-13       | 1.70E-11   |
| GO:0006082     | P               | organic acid metabolic process                 | 99                          | 2105                    | 1.40E-13       | 1.80E-11   |
| GO:0050832     | P               | defense response to fungus                     | 35                          | 342                     | 1.40E-13       | 1.90E-11   |
| GO:0065007     | P               | biological regulation                          | 210                         | 6222                    | 1.70E-13       | 2.20E-11   |
| GO:0002679     | P               | respiratory burst during defense response      | 22                          | 121                     | 2.30E-13       | 2.60E-11   |
| GO:0009605     | P               | response to external stimulus                  | 65                          | 1087                    | 2.30E-13       | 2.60E-11   |
| GO:0042180     | P               | cellular ketone metabolic process              | 99                          | 2123                    | 2.20E-13       | 2.60E-11   |
| GO:0045730     | P               | respiratory burst                              | 22                          | 121                     | 2.30E-13       | 2.60E-11   |
| GO:0019684     | P               | photosynthesis, light reaction                 | 34                          | 333                     | 3.40E-13       | 3.80E-11   |
| GO:0023052     | P               | signaling                                      | 106                         | 2376                    | 3.90E-13       | 4.20E-11   |
| GO:0006810     | P               | transport                                      | 140                         | 3577                    | 4.80E-13       | 4.90E-11   |
| GO:0044237     | P               | cellular metabolic process                     | 330                         | 11509                   | 4.70E-13       | 4.90E-11   |
| GO:0009987     | P               | cellular process                               | 391                         | 14419                   | 4.60E-13       | 4.90E-11   |
| GO:0044281     | P               | small molecule metabolic process               | 153                         | 4065                    | 5.60E-13       | 5.60E-11   |
| GO:0033554     | P               | cellular response to stress                    | 77                          | 1473                    | 8.10E-13       | 7.80E-11   |
| GO:0008152     | P               | metabolic process                              | 374                         | 13633                   | 7.90E-13       | 7.80E-11   |

|            |   |                                                  |     |      |          |          |
|------------|---|--------------------------------------------------|-----|------|----------|----------|
| GO:0009863 | P | salicylic acid mediated signaling pathway        | 34  | 349  | 1.20E-12 | 1.10E-10 |
| GO:0071446 | P | cellular response to salicylic acid stimulus     | 34  | 351  | 1.30E-12 | 1.20E-10 |
| GO:0051179 | P | localization                                     | 145 | 3819 | 1.50E-12 | 1.40E-10 |
| GO:0000096 | P | sulfur amino acid metabolic process              | 39  | 465  | 1.90E-12 | 1.70E-10 |
| GO:0051234 | P | establishment of localization                    | 140 | 3652 | 2.10E-12 | 1.90E-10 |
| GO:0010941 | P | regulation of cell death                         | 36  | 405  | 2.90E-12 | 2.50E-10 |
| GO:0023034 | P | intracellular signaling pathway                  | 37  | 433  | 4.30E-12 | 3.60E-10 |
| GO:0030001 | P | metal ion transport                              | 43  | 576  | 4.90E-12 | 4.10E-10 |
| GO:0006519 | P | cellular amino acid and derivative metabolic pr  | 70  | 1324 | 6.10E-12 | 5.00E-10 |
| GO:0006790 | P | sulfur metabolic process                         | 47  | 683  | 6.90E-12 | 5.60E-10 |
| GO:0043067 | P | regulation of programmed cell death              | 35  | 397  | 7.30E-12 | 5.80E-10 |
| GO:0042743 | P | hydrogen peroxide metabolic process              | 32  | 335  | 8.70E-12 | 6.80E-10 |
| GO:0032870 | P | cellular response to hormone stimulus            | 45  | 641  | 1.10E-11 | 8.20E-10 |
| GO:0009867 | P | jasmonic acid mediated signaling pathway         | 29  | 282  | 1.60E-11 | 1.20E-09 |
| GO:0071395 | P | cellular response to jasmonic acid stimulus      | 29  | 282  | 1.60E-11 | 1.20E-09 |
| GO:0009755 | P | hormone-mediated signaling pathway               | 43  | 600  | 1.70E-11 | 1.20E-09 |
| GO:0044106 | P | cellular amine metabolic process                 | 56  | 947  | 1.80E-11 | 1.30E-09 |
| GO:0006800 | P | oxygen and reactive oxygen species metabolic     | 32  | 347  | 2.00E-11 | 1.40E-09 |
| GO:0010363 | P | regulation of plant-type hypersensitive respons  | 33  | 371  | 2.40E-11 | 1.70E-09 |
| GO:0009414 | P | response to water deprivation                    | 35  | 416  | 2.40E-11 | 1.70E-09 |
| GO:0009814 | P | defense response, incompatible interaction       | 40  | 536  | 2.80E-11 | 1.90E-09 |
| GO:0050794 | P | regulation of cellular process                   | 161 | 4595 | 3.00E-11 | 2.10E-09 |
| GO:0009862 | P | systemic acquired resistance, salicylic acid med | 27  | 251  | 3.20E-11 | 2.20E-09 |
| GO:0009738 | P | abscisic acid mediated signaling pathway         | 27  | 252  | 3.50E-11 | 2.30E-09 |
| GO:0050789 | P | regulation of biological process                 | 177 | 5235 | 3.60E-11 | 2.40E-09 |
| GO:0009415 | P | response to water                                | 35  | 424  | 4.00E-11 | 2.50E-09 |
| GO:0080135 | P | regulation of cellular response to stress        | 33  | 379  | 4.00E-11 | 2.50E-09 |
| GO:0009626 | P | plant-type hypersensitive response               | 34  | 401  | 3.90E-11 | 2.50E-09 |
| GO:0023033 | P | signaling pathway                                | 39  | 519  | 4.10E-11 | 2.50E-09 |
| GO:0034050 | P | host programmed cell death induced by symbic     | 34  | 402  | 4.10E-11 | 2.50E-09 |
| GO:0012501 | P | programmed cell death                            | 36  | 451  | 5.00E-11 | 3.00E-09 |
| GO:0009308 | P | amine metabolic process                          | 58  | 1034 | 5.40E-11 | 3.20E-09 |
| GO:0008219 | P | cell death                                       | 38  | 500  | 5.40E-11 | 3.20E-09 |
| GO:0016265 | P | death                                            | 38  | 500  | 5.40E-11 | 3.20E-09 |
| GO:0009696 | P | salicylic acid metabolic process                 | 25  | 222  | 7.20E-11 | 4.20E-09 |
| GO:0045088 | P | regulation of innate immune response             | 34  | 415  | 9.10E-11 | 5.20E-09 |
| GO:0007165 | P | signal transduction                              | 78  | 1670 | 1.10E-10 | 6.00E-09 |
| GO:0050776 | P | regulation of immune response                    | 34  | 419  | 1.20E-10 | 6.30E-09 |
| GO:0002682 | P | regulation of immune system process              | 34  | 419  | 1.20E-10 | 6.30E-09 |
| GO:0071215 | P | cellular response to abscisic acid stimulus      | 27  | 267  | 1.20E-10 | 6.30E-09 |
| GO:0009697 | P | salicylic acid biosynthetic process              | 24  | 209  | 1.20E-10 | 6.50E-09 |
| GO:0009723 | P | response to ethylene stimulus                    | 31  | 353  | 1.30E-10 | 6.90E-09 |
| GO:0019438 | P | aromatic compound biosynthetic process           | 44  | 680  | 2.10E-10 | 1.10E-08 |
| GO:0006520 | P | cellular amino acid metabolic process            | 51  | 882  | 3.10E-10 | 1.60E-08 |
| GO:0006612 | P | protein targeting to membrane                    | 32  | 392  | 3.60E-10 | 1.80E-08 |
| GO:0042742 | P | defense response to bacterium                    | 32  | 394  | 4.00E-10 | 2.10E-08 |
| GO:0010310 | P | regulation of hydrogen peroxide metabolic proc   | 22  | 187  | 4.70E-10 | 2.40E-08 |
| GO:0009627 | P | systemic acquired resistance                     | 34  | 445  | 5.00E-10 | 2.50E-08 |
| GO:0080010 | P | regulation of oxygen and reactive oxygen speci   | 22  | 188  | 5.20E-10 | 2.60E-08 |
| GO:0023060 | P | signal transmission                              | 79  | 1767 | 5.60E-10 | 2.70E-08 |
| GO:0023046 | P | signaling process                                | 79  | 1768 | 5.70E-10 | 2.80E-08 |
| GO:0019344 | P | cysteine biosynthetic process                    | 23  | 210  | 6.80E-10 | 3.30E-08 |
| GO:0002252 | P | immune effector process                          | 26  | 273  | 8.40E-10 | 4.00E-08 |
| GO:0006534 | P | cysteine metabolic process                       | 23  | 213  | 8.80E-10 | 4.10E-08 |
| GO:0031323 | P | regulation of cellular metabolic process         | 111 | 2928 | 1.40E-09 | 6.60E-08 |
| GO:0009642 | P | response to light intensity                      | 26  | 282  | 1.60E-09 | 7.30E-08 |
| GO:0009070 | P | serine family amino acid biosynthetic process    | 23  | 222  | 1.80E-09 | 8.40E-08 |
| GO:0030968 | P | endoplasmic reticulum unfolded protein respon:   | 21  | 185  | 2.10E-09 | 9.60E-08 |

Table S3

|            |   |                                                   |     |       |          |          |
|------------|---|---------------------------------------------------|-----|-------|----------|----------|
| GO:0034620 | P | cellular response to unfolded protein             | 21  | 187   | 2.50E-09 | 1.10E-07 |
| GO:0006986 | P | response to unfolded protein                      | 21  | 187   | 2.50E-09 | 1.10E-07 |
| GO:0019222 | P | regulation of metabolic process                   | 117 | 3186  | 2.80E-09 | 1.20E-07 |
| GO:0031347 | P | regulation of defense response                    | 36  | 529   | 2.80E-09 | 1.20E-07 |
| GO:0000165 | P | MAPKKK cascade                                    | 22  | 209   | 3.10E-09 | 1.40E-07 |
| GO:0009069 | P | serine family amino acid metabolic process        | 25  | 271   | 3.20E-09 | 1.40E-07 |
| GO:0044271 | P | cellular nitrogen compound biosynthetic proces    | 46  | 804   | 3.30E-09 | 1.40E-07 |
| GO:0044272 | P | sulfur compound biosynthetic process              | 34  | 486   | 4.10E-09 | 1.70E-07 |
| GO:0006984 | P | ER-nuclear signaling pathway                      | 21  | 193   | 4.20E-09 | 1.80E-07 |
| GO:0071445 | P | cellular response to protein stimulus             | 21  | 194   | 4.50E-09 | 1.90E-07 |
| GO:0009612 | P | response to mechanical stimulus                   | 13  | 63    | 4.90E-09 | 2.00E-07 |
| GO:0070838 | P | divalent metal ion transport                      | 21  | 195   | 4.90E-09 | 2.00E-07 |
| GO:0006725 | P | cellular aromatic compound metabolic process      | 53  | 1022  | 5.10E-09 | 2.10E-07 |
| GO:0009651 | P | response to salt stress                           | 45  | 788   | 5.20E-09 | 2.10E-07 |
| GO:0010035 | P | response to inorganic substance                   | 55  | 1086  | 5.60E-09 | 2.20E-07 |
| GO:0080134 | P | regulation of response to stress                  | 36  | 544   | 5.60E-09 | 2.20E-07 |
| GO:0071216 | P | cellular response to biotic stimulus              | 21  | 197   | 5.80E-09 | 2.30E-07 |
| GO:0031408 | P | oxylipin biosynthetic process                     | 18  | 142   | 6.30E-09 | 2.40E-07 |
| GO:0009409 | P | response to cold                                  | 39  | 629   | 7.00E-09 | 2.70E-07 |
| GO:0009617 | P | response to bacterium                             | 37  | 577   | 7.50E-09 | 2.90E-07 |
| GO:0009309 | P | amine biosynthetic process                        | 35  | 527   | 8.40E-09 | 3.20E-07 |
| GO:0008652 | P | cellular amino acid biosynthetic process          | 34  | 503   | 9.20E-09 | 3.50E-07 |
| GO:0007243 | P | protein kinase cascade                            | 22  | 223   | 9.30E-09 | 3.50E-07 |
| GO:0048583 | P | regulation of response to stimulus                | 40  | 667   | 1.10E-08 | 4.00E-07 |
| GO:0051606 | P | detection of stimulus                             | 18  | 148   | 1.10E-08 | 4.20E-07 |
| GO:0006970 | P | response to osmotic stress                        | 46  | 842   | 1.30E-08 | 4.60E-07 |
| GO:0043069 | P | negative regulation of programmed cell death      | 19  | 170   | 1.50E-08 | 5.60E-07 |
| GO:0031348 | P | negative regulation of defense response           | 24  | 273   | 1.60E-08 | 5.70E-07 |
| GO:0019748 | P | secondary metabolic process                       | 59  | 1247  | 1.60E-08 | 5.70E-07 |
| GO:0006807 | P | nitrogen compound metabolic process               | 177 | 5675  | 1.80E-08 | 6.40E-07 |
| GO:0060548 | P | negative regulation of cell death                 | 19  | 174   | 2.20E-08 | 7.70E-07 |
| GO:0009595 | P | detection of biotic stimulus                      | 15  | 104   | 2.50E-08 | 8.60E-07 |
| GO:0048585 | P | negative regulation of response to stimulus       | 27  | 349   | 2.40E-08 | 8.60E-07 |
| GO:0009058 | P | biosynthetic process                              | 230 | 7962  | 2.80E-08 | 9.90E-07 |
| GO:0034976 | P | response to endoplasmic reticulum stress          | 27  | 352   | 2.90E-08 | 9.90E-07 |
| GO:0000097 | P | sulfur amino acid biosynthetic process            | 25  | 309   | 3.60E-08 | 1.20E-06 |
| GO:0009873 | P | ethylene mediated signaling pathway               | 16  | 125   | 3.80E-08 | 1.30E-06 |
| GO:0044249 | P | cellular biosynthetic process                     | 224 | 7737  | 4.20E-08 | 1.40E-06 |
| GO:0080090 | P | regulation of primary metabolic process           | 101 | 2761  | 5.20E-08 | 1.70E-06 |
| GO:0031407 | P | oxylipin metabolic process                        | 18  | 168   | 6.60E-08 | 2.20E-06 |
| GO:0015674 | P | di-, tri-valent inorganic cation transport        | 25  | 321   | 7.10E-08 | 2.40E-06 |
| GO:0048519 | P | negative regulation of biological process         | 57  | 1243  | 7.80E-08 | 2.60E-06 |
| GO:0030003 | P | cellular cation homeostasis                       | 18  | 172   | 9.20E-08 | 3.00E-06 |
| GO:0010286 | P | heat acclimation                                  | 13  | 84    | 1.00E-07 | 3.30E-06 |
| GO:0009695 | P | jasmonic acid biosynthetic process                | 16  | 136   | 1.10E-07 | 3.50E-06 |
| GO:0042398 | P | cellular amino acid derivative biosynthetic proci | 33  | 534   | 1.10E-07 | 3.50E-06 |
| GO:0043900 | P | regulation of multi-organism process              | 15  | 118   | 1.10E-07 | 3.50E-06 |
| GO:0055080 | P | cation homeostasis                                | 20  | 217   | 1.20E-07 | 3.90E-06 |
| GO:0071369 | P | cellular response to ethylene stimulus            | 16  | 144   | 2.30E-07 | 7.10E-06 |
| GO:0009416 | P | response to light stimulus                        | 54  | 1188  | 2.30E-07 | 7.10E-06 |
| GO:0006873 | P | cellular ion homeostasis                          | 18  | 185   | 2.50E-07 | 7.70E-06 |
| GO:0055082 | P | cellular chemical homeostasis                     | 18  | 186   | 2.70E-07 | 8.30E-06 |
| GO:0044238 | P | primary metabolic process                         | 308 | 11717 | 3.00E-07 | 9.30E-06 |
| GO:0006633 | P | fatty acid biosynthetic process                   | 23  | 303   | 3.60E-07 | 1.10E-05 |
| GO:0009408 | P | response to heat                                  | 23  | 303   | 3.60E-07 | 1.10E-05 |
| GO:0019725 | P | cellular homeostasis                              | 24  | 328   | 3.80E-07 | 1.10E-05 |
| GO:0032787 | P | monocarboxylic acid metabolic process             | 62  | 1481  | 4.30E-07 | 1.30E-05 |
| GO:0009773 | P | photosynthetic electron transport in photosyste   | 10  | 51    | 4.50E-07 | 1.30E-05 |

Table S3

|            |   |                                                  |    |      |          |          |
|------------|---|--------------------------------------------------|----|------|----------|----------|
| GO:0050801 | P | ion homeostasis                                  | 20 | 240  | 5.40E-07 | 1.60E-05 |
| GO:0046686 | P | response to cadmium ion                          | 29 | 470  | 6.70E-07 | 2.00E-05 |
| GO:0010038 | P | response to metal ion                            | 34 | 610  | 6.80E-07 | 2.00E-05 |
| GO:0016311 | P | dephosphorylation                                | 20 | 245  | 7.30E-07 | 2.10E-05 |
| GO:0009694 | P | jasmonic acid metabolic process                  | 16 | 160  | 8.20E-07 | 2.40E-05 |
| GO:0006778 | P | porphyrin metabolic process                      | 19 | 226  | 9.20E-07 | 2.60E-05 |
| GO:0033013 | P | tetrapyrrole metabolic process                   | 19 | 227  | 9.70E-07 | 2.80E-05 |
| GO:0006575 | P | cellular amino acid derivative metabolic proces  | 37 | 714  | 1.10E-06 | 3.30E-05 |
| GO:0000160 | P | two-component signal transduction system (ph     | 16 | 165  | 1.20E-06 | 3.40E-05 |
| GO:0009314 | P | response to radiation                            | 54 | 1263 | 1.40E-06 | 3.90E-05 |
| GO:0048878 | P | chemical homeostasis                             | 21 | 281  | 1.50E-06 | 4.10E-05 |
| GO:0006470 | P | protein amino acid dephosphorylation             | 18 | 214  | 1.80E-06 | 4.90E-05 |
| GO:0031399 | P | regulation of protein modification process       | 15 | 150  | 1.80E-06 | 5.00E-05 |
| GO:0035304 | P | regulation of protein amino acid dephosphoryla   | 14 | 135  | 2.70E-06 | 7.40E-05 |
| GO:0009767 | P | photosynthetic electron transport chain          | 11 | 80   | 2.70E-06 | 7.50E-05 |
| GO:0010207 | P | photosystem II assembly                          | 16 | 177  | 2.80E-06 | 7.60E-05 |
| GO:0035303 | P | regulation of dephosphorylation                  | 14 | 137  | 3.20E-06 | 8.50E-05 |
| GO:0009644 | P | response to high light intensity                 | 18 | 224  | 3.20E-06 | 8.60E-05 |
| GO:0051789 | P | response to protein stimulus                     | 24 | 376  | 3.60E-06 | 9.60E-05 |
| GO:0044275 | P | cellular carbohydrate catabolic process          | 30 | 545  | 3.90E-06 | 0.0001   |
| GO:0006979 | P | response to oxidative stress                     | 31 | 582  | 5.10E-06 | 0.00013  |
| GO:0006631 | P | fatty acid metabolic process                     | 31 | 587  | 6.00E-06 | 0.00016  |
| GO:0015994 | P | chlorophyll metabolic process                    | 16 | 189  | 6.10E-06 | 0.00016  |
| GO:0009765 | P | photosynthesis, light harvesting                 | 8  | 41   | 6.60E-06 | 0.00017  |
| GO:0006007 | P | glucose catabolic process                        | 27 | 474  | 6.60E-06 | 0.00017  |
| GO:0019320 | P | hexose catabolic process                         | 27 | 476  | 7.10E-06 | 0.00018  |
| GO:0032268 | P | regulation of cellular protein metabolic process | 17 | 215  | 7.30E-06 | 0.00019  |
| GO:0015849 | P | organic acid transport                           | 20 | 289  | 7.60E-06 | 0.00019  |
| GO:0046365 | P | monosaccharide catabolic process                 | 27 | 480  | 8.20E-06 | 0.00021  |
| GO:0060255 | P | regulation of macromolecule metabolic process    | 94 | 2829 | 8.80E-06 | 0.00022  |
| GO:0009056 | P | catabolic process                                | 77 | 2182 | 8.90E-06 | 0.00022  |
| GO:0016052 | P | carbohydrate catabolic process                   | 30 | 573  | 9.80E-06 | 0.00025  |
| GO:0048523 | P | negative regulation of cellular process          | 37 | 789  | 1.00E-05 | 0.00025  |
| GO:0015672 | P | monovalent inorganic cation transport            | 18 | 245  | 1.00E-05 | 0.00025  |
| GO:0042592 | P | homeostatic process                              | 27 | 488  | 1.10E-05 | 0.00027  |
| GO:0046164 | P | alcohol catabolic process                        | 27 | 491  | 1.20E-05 | 0.00029  |
| GO:0006972 | P | hyperosmotic response                            | 18 | 251  | 1.40E-05 | 0.00034  |
| GO:0042538 | P | hyperosmotic salinity response                   | 14 | 162  | 1.80E-05 | 0.00045  |
| GO:0046942 | P | carboxylic acid transport                        | 19 | 283  | 1.90E-05 | 0.00046  |
| GO:0051246 | P | regulation of protein metabolic process          | 17 | 237  | 2.40E-05 | 0.00057  |
| GO:0019318 | P | hexose metabolic process                         | 30 | 602  | 2.40E-05 | 0.00057  |
| GO:0006865 | P | amino acid transport                             | 18 | 266  | 2.80E-05 | 0.00068  |
| GO:0043269 | P | regulation of ion transport                      | 13 | 147  | 2.90E-05 | 0.00069  |
| GO:0006006 | P | glucose metabolic process                        | 28 | 554  | 3.50E-05 | 0.00083  |
| GO:0015837 | P | amine transport                                  | 18 | 272  | 3.70E-05 | 0.00088  |
| GO:0006813 | P | potassium ion transport                          | 8  | 54   | 3.90E-05 | 0.00092  |
| GO:0044248 | P | cellular catabolic process                       | 72 | 2095 | 4.10E-05 | 0.00095  |
| GO:0009692 | P | ethylene metabolic process                       | 12 | 131  | 4.30E-05 | 0.00099  |
| GO:0009693 | P | ethylene biosynthetic process                    | 12 | 131  | 4.30E-05 | 0.00099  |
| GO:0006740 | P | NADPH regeneration                               | 15 | 201  | 4.60E-05 | 0.0011   |
| GO:0051186 | P | cofactor metabolic process                       | 34 | 753  | 4.70E-05 | 0.0011   |
| GO:0043449 | P | cellular alkene metabolic process                | 12 | 133  | 4.90E-05 | 0.0011   |
| GO:0043450 | P | alkene biosynthetic process                      | 12 | 133  | 4.90E-05 | 0.0011   |
| GO:0046483 | P | heterocycle metabolic process                    | 42 | 1023 | 5.10E-05 | 0.0012   |
| GO:0006739 | P | NADP metabolic process                           | 15 | 204  | 5.40E-05 | 0.0012   |
| GO:0009733 | P | response to auxin stimulus                       | 23 | 431  | 8.00E-05 | 0.0018   |
| GO:0046496 | P | nicotinamide nucleotide metabolic process        | 15 | 212  | 8.10E-05 | 0.0018   |
| GO:0006769 | P | nicotinamide metabolic process                   | 15 | 212  | 8.10E-05 | 0.0018   |

Table S3



|            |   |                                                  |     |      |          |        |
|------------|---|--------------------------------------------------|-----|------|----------|--------|
| GO:0019362 | P | pyridine nucleotide metabolic process            | 15  | 214  | 8.90E-05 | 0.002  |
| GO:0070482 | P | response to oxygen levels                        | 10  | 104  | 0.00013  | 0.0028 |
| GO:0051049 | P | regulation of transport                          | 13  | 172  | 0.00013  | 0.0028 |
| GO:0043603 | P | cellular amide metabolic process                 | 15  | 222  | 0.00013  | 0.0029 |
| GO:0044282 | P | small molecule catabolic process                 | 38  | 932  | 0.00013  | 0.0029 |
| GO:0042440 | P | pigment metabolic process                        | 20  | 361  | 0.00014  | 0.0031 |
| GO:0009820 | P | alkaloid metabolic process                       | 15  | 225  | 0.00015  | 0.0032 |
| GO:0009066 | P | aspartate family amino acid metabolic process    | 17  | 278  | 0.00015  | 0.0032 |
| GO:0006098 | P | pentose-phosphate shunt                          | 14  | 200  | 0.00015  | 0.0033 |
| GO:0005996 | P | monosaccharide metabolic process                 | 34  | 804  | 0.00016  | 0.0033 |
| GO:0006605 | P | protein targeting                                | 37  | 906  | 0.00016  | 0.0034 |
| GO:0051252 | P | regulation of RNA metabolic process              | 77  | 2388 | 0.00016  | 0.0034 |
| GO:0005975 | P | carbohydrate metabolic process                   | 73  | 2249 | 0.0002   | 0.0042 |
| GO:0022900 | P | electron transport chain                         | 11  | 133  | 0.0002   | 0.0043 |
| GO:0032879 | P | regulation of localization                       | 14  | 207  | 0.00022  | 0.0045 |
| GO:0009646 | P | response to absence of light                     | 6   | 37   | 0.00024  | 0.0049 |
| GO:0006820 | P | anion transport                                  | 19  | 350  | 0.00027  | 0.0055 |
| GO:0031326 | P | regulation of cellular biosynthetic process      | 82  | 2631 | 0.00028  | 0.0057 |
| GO:0009889 | P | regulation of biosynthetic process               | 82  | 2634 | 0.00029  | 0.0059 |
| GO:0006733 | P | oxidoreduction coenzyme metabolic process        | 16  | 267  | 0.00029  | 0.0059 |
| GO:0006355 | P | regulation of transcription, DNA-dependent       | 75  | 2372 | 0.00035  | 0.007  |
| GO:0070647 | P | protein modification by small protein conjugatic | 21  | 418  | 0.00035  | 0.0071 |
| GO:0045449 | P | regulation of transcription                      | 75  | 2376 | 0.00036  | 0.0073 |
| GO:0006096 | P | glycolysis                                       | 14  | 219  | 0.00037  | 0.0074 |
| GO:0046907 | P | intracellular transport                          | 50  | 1423 | 0.0004   | 0.008  |
| GO:0001666 | P | response to hypoxia                              | 9   | 100  | 0.00043  | 0.0085 |
| GO:0043170 | P | macromolecule metabolic process                  | 234 | 9246 | 0.00043  | 0.0085 |
| GO:0044255 | P | cellular lipid metabolic process                 | 49  | 1395 | 0.00046  | 0.0091 |
| GO:0006066 | P | alcohol metabolic process                        | 42  | 1143 | 0.0005   | 0.0098 |
| GO:0051649 | P | establishment of localization in cell            | 53  | 1554 | 0.00053  | 0.01   |
| GO:0052542 | P | callose deposition during defense response       | 7   | 62   | 0.00054  | 0.011  |
| GO:0010556 | P | regulation of macromolecule biosynthetic proce   | 77  | 2491 | 0.00055  | 0.011  |
| GO:0006464 | P | protein modification process                     | 84  | 2773 | 0.00055  | 0.011  |
| GO:0010468 | P | regulation of gene expression                    | 82  | 2695 | 0.00057  | 0.011  |
| GO:0019219 | P | regulation of nucleobase, nucleoside, nucleotide | 77  | 2496 | 0.00058  | 0.011  |
| GO:0009698 | P | phenylpropanoid metabolic process                | 20  | 405  | 0.00059  | 0.011  |
| GO:0019220 | P | regulation of phosphate metabolic process        | 14  | 231  | 0.00061  | 0.012  |
| GO:0051174 | P | regulation of phosphorus metabolic process       | 14  | 231  | 0.00061  | 0.012  |
| GO:0008610 | P | lipid biosynthetic process                       | 42  | 1159 | 0.00065  | 0.012  |
| GO:0043623 | P | cellular protein complex assembly                | 23  | 504  | 0.00067  | 0.013  |
| GO:0051641 | P | cellular localization                            | 54  | 1613 | 0.00071  | 0.013  |
| GO:0042542 | P | response to hydrogen peroxide                    | 15  | 263  | 0.00071  | 0.013  |
| GO:0051171 | P | regulation of nitrogen compound metabolic pro    | 77  | 2517 | 0.00073  | 0.014  |
| GO:0006555 | P | methionine metabolic process                     | 14  | 236  | 0.00074  | 0.014  |
| GO:0006779 | P | porphyrin biosynthetic process                   | 11  | 157  | 0.00076  | 0.014  |
| GO:0009744 | P | response to sucrose stimulus                     | 13  | 210  | 0.00078  | 0.014  |
| GO:0006461 | P | protein complex assembly                         | 25  | 577  | 0.00081  | 0.015  |
| GO:0070271 | P | protein complex biogenesis                       | 25  | 577  | 0.00081  | 0.015  |
| GO:0044262 | P | cellular carbohydrate metabolic process          | 58  | 1778 | 0.00082  | 0.015  |
| GO:0009699 | P | phenylpropanoid biosynthetic process             | 17  | 327  | 0.00087  | 0.016  |
| GO:0033014 | P | tetrapyrrole biosynthetic process                | 11  | 160  | 0.00088  | 0.016  |
| GO:0034285 | P | response to disaccharide stimulus                | 13  | 213  | 0.00088  | 0.016  |
| GO:0007154 | P | cell communication                               | 30  | 758  | 0.001    | 0.019  |
| GO:0006636 | P | unsaturated fatty acid biosynthetic process      | 7   | 70   | 0.001    | 0.019  |
| GO:0043687 | P | post-translational protein modification          | 65  | 2075 | 0.0011   | 0.02   |
| GO:0033559 | P | unsaturated fatty acid metabolic process         | 7   | 71   | 0.0011   | 0.02   |
| GO:0034622 | P | cellular macromolecular complex assembly         | 25  | 592  | 0.0011   | 0.02   |
| GO:0052545 | P | callose localization                             | 8   | 93   | 0.0012   | 0.021  |

Table S3

|            |   |                                               |     |       |          |          |
|------------|---|-----------------------------------------------|-----|-------|----------|----------|
| GO:0065008 | P | regulation of biological quality              | 54  | 1654  | 0.0012   | 0.021    |
| GO:0033037 | P | polysaccharide localization                   | 8   | 94    | 0.0012   | 0.022    |
| GO:0006629 | P | lipid metabolic process                       | 57  | 1772  | 0.0012   | 0.022    |
| GO:0065003 | P | macromolecular complex assembly               | 27  | 665   | 0.0013   | 0.022    |
| GO:0034613 | P | cellular protein localization                 | 38  | 1059  | 0.0014   | 0.024    |
| GO:0015824 | P | proline transport                             | 7   | 74    | 0.0014   | 0.024    |
| GO:0043090 | P | amino acid import                             | 7   | 75    | 0.0015   | 0.026    |
| GO:0010167 | P | response to nitrate                           | 12  | 199   | 0.0015   | 0.026    |
| GO:0019722 | P | calcium-mediated signaling                    | 6   | 55    | 0.0016   | 0.027    |
| GO:0015992 | P | proton transport                              | 10  | 147   | 0.0016   | 0.027    |
| GO:0006818 | P | hydrogen transport                            | 10  | 147   | 0.0016   | 0.027    |
| GO:0018130 | P | heterocycle biosynthetic process              | 14  | 258   | 0.0017   | 0.028    |
| GO:0010218 | P | response to far red light                     | 8   | 99    | 0.0017   | 0.029    |
| GO:0010155 | P | regulation of proton transport                | 7   | 77    | 0.0017   | 0.029    |
| GO:0015804 | P | neutral amino acid transport                  | 7   | 77    | 0.0017   | 0.029    |
| GO:0006598 | P | polyamine catabolic process                   | 5   | 38    | 0.0018   | 0.031    |
| GO:0015995 | P | chlorophyll biosynthetic process              | 9   | 125   | 0.0019   | 0.031    |
| GO:0044260 | P | cellular macromolecule metabolic process      | 215 | 8616  | 0.0019   | 0.031    |
| GO:0009117 | P | nucleotide metabolic process                  | 27  | 685   | 0.0019   | 0.032    |
| GO:0006886 | P | intracellular protein transport               | 37  | 1044  | 0.0019   | 0.032    |
| GO:0034621 | P | cellular macromolecular complex subunit organ | 25  | 617   | 0.002    | 0.032    |
| GO:0009637 | P | response to blue light                        | 9   | 126   | 0.002    | 0.032    |
| GO:0006753 | P | nucleoside phosphate metabolic process        | 27  | 687   | 0.002    | 0.033    |
| GO:0006364 | P | rRNA processing                               | 16  | 324   | 0.002    | 0.033    |
| GO:0015996 | P | chlorophyll catabolic process                 | 6   | 58    | 0.002    | 0.033    |
| GO:0046149 | P | pigment catabolic process                     | 6   | 58    | 0.002    | 0.033    |
| GO:0016072 | P | rRNA metabolic process                        | 16  | 325   | 0.0021   | 0.033    |
| GO:0015706 | P | nitrate transport                             | 12  | 207   | 0.0021   | 0.033    |
| GO:0031668 | P | cellular response to extracellular stimulus   | 18  | 388   | 0.0021   | 0.033    |
| GO:0071496 | P | cellular response to external stimulus        | 18  | 389   | 0.0021   | 0.034    |
| GO:0016567 | P | protein ubiquitination                        | 14  | 266   | 0.0022   | 0.034    |
| GO:0043933 | P | macromolecular complex subunit organization   | 27  | 691   | 0.0022   | 0.034    |
| GO:0010114 | P | response to red light                         | 8   | 104   | 0.0023   | 0.036    |
| GO:0070727 | P | cellular macromolecule localization           | 38  | 1093  | 0.0023   | 0.037    |
| GO:0006595 | P | polyamine metabolic process                   | 6   | 60    | 0.0024   | 0.037    |
| GO:0009581 | P | detection of external stimulus                | 6   | 60    | 0.0024   | 0.037    |
| GO:0009657 | P | plastid organization                          | 18  | 398   | 0.0027   | 0.042    |
| GO:0006787 | P | porphyrin catabolic process                   | 6   | 62    | 0.0028   | 0.043    |
| GO:0033015 | P | tetrapyrrole catabolic process                | 6   | 62    | 0.0028   | 0.043    |
| GO:0000302 | P | response to reactive oxygen species           | 16  | 338   | 0.003    | 0.046    |
| GO:0043412 | P | macromolecule modification                    | 90  | 3199  | 0.0031   | 0.047    |
| GO:0006351 | P | transcription, DNA-dependent                  | 76  | 2618  | 0.0031   | 0.047    |
| GO:0006350 | P | transcription                                 | 76  | 2620  | 0.0031   | 0.048    |
| GO:0032774 | P | RNA biosynthetic process                      | 76  | 2621  | 0.0032   | 0.048    |
| GO:0005488 | F | binding                                       | 303 | 11247 | 3.20E-08 | 1.50E-05 |
| GO:0005515 | F | protein binding                               | 99  | 2709  | 7.60E-08 | 1.50E-05 |
| GO:0046872 | F | metal ion binding                             | 103 | 2853  | 7.00E-08 | 1.50E-05 |
| GO:0043167 | F | ion binding                                   | 106 | 3030  | 2.00E-07 | 2.40E-05 |
| GO:0043169 | F | cation binding                                | 106 | 3029  | 1.90E-07 | 2.40E-05 |
| GO:0003700 | F | transcription factor activity                 | 67  | 1682  | 7.80E-07 | 7.90E-05 |
| GO:0030528 | F | transcription regulator activity              | 67  | 1740  | 2.40E-06 | 0.00021  |
| GO:0016168 | F | chlorophyll binding                           | 7   | 32    | 1.30E-05 | 0.0009   |
| GO:0046873 | F | metal ion transmembrane transporter activity  | 14  | 157   | 1.30E-05 | 0.0009   |
| GO:0046914 | F | transition metal ion binding                  | 77  | 2313  | 6.00E-05 | 0.0036   |
| GO:0043565 | F | sequence-specific DNA binding                 | 22  | 402   | 8.10E-05 | 0.0045   |
| GO:0005509 | F | calcium ion binding                           | 16  | 258   | 0.0002   | 0.0089   |
| GO:0046915 | F | transition metal ion transmembrane transporte | 7   | 52    | 0.0002   | 0.0089   |
| GO:0003677 | F | DNA binding                                   | 77  | 2399  | 0.00018  | 0.0089   |

Table S3



|            |   |                                               |     |       |          |          |
|------------|---|-----------------------------------------------|-----|-------|----------|----------|
| GO:0022890 | F | inorganic cation transmembrane transporter ac | 15  | 241   | 0.0003   | 0.012    |
| GO:0008270 | F | zinc ion binding                              | 52  | 1521  | 0.00056  | 0.021    |
| GO:0005516 | F | calmodulin binding                            | 12  | 190   | 0.001    | 0.037    |
| GO:0031976 | C | plastid thylakoid                             | 40  | 425   | 3.20E-14 | 3.00E-12 |
| GO:0055035 | C | plastid thylakoid membrane                    | 35  | 324   | 3.40E-14 | 3.00E-12 |
| GO:0009579 | C | thylakoid                                     | 45  | 518   | 1.10E-14 | 3.00E-12 |
| GO:0009535 | C | chloroplast thylakoid membrane                | 35  | 322   | 2.90E-14 | 3.00E-12 |
| GO:0009534 | C | chloroplast thylakoid                         | 40  | 425   | 3.20E-14 | 3.00E-12 |
| GO:0031984 | C | organelle subcompartment                      | 40  | 428   | 3.90E-14 | 3.00E-12 |
| GO:0034357 | C | photosynthetic membrane                       | 36  | 355   | 8.30E-14 | 5.40E-12 |
| GO:0042651 | C | thylakoid membrane                            | 35  | 341   | 1.30E-13 | 7.60E-12 |
| GO:0044436 | C | thylakoid part                                | 37  | 388   | 2.10E-13 | 1.10E-11 |
| GO:0044434 | C | chloroplast part                              | 68  | 1211  | 9.70E-13 | 4.40E-11 |
| GO:0016020 | C | membrane                                      | 203 | 6122  | 3.10E-12 | 1.30E-10 |
| GO:0044435 | C | plastid part                                  | 68  | 1252  | 4.10E-12 | 1.50E-10 |
| GO:0009521 | C | photosystem                                   | 16  | 68    | 1.50E-11 | 5.30E-10 |
| GO:0009522 | C | photosystem I                                 | 10  | 22    | 5.50E-10 | 1.80E-08 |
| GO:0009941 | C | chloroplast envelope                          | 37  | 573   | 6.30E-09 | 1.90E-07 |
| GO:0031090 | C | organelle membrane                            | 62  | 1327  | 1.00E-08 | 3.00E-07 |
| GO:0009526 | C | plastid envelope                              | 37  | 598   | 1.80E-08 | 4.90E-07 |
| GO:0031975 | C | envelope                                      | 48  | 929   | 3.10E-08 | 7.50E-07 |
| GO:0031967 | C | organelle envelope                            | 48  | 929   | 3.10E-08 | 7.50E-07 |
| GO:0005886 | C | plasma membrane                               | 127 | 3740  | 4.50E-08 | 1.00E-06 |
| GO:0010287 | C | plastoglobule                                 | 12  | 68    | 8.80E-08 | 1.90E-06 |
| GO:0044446 | C | intracellular organelle part                  | 115 | 3379  | 2.10E-07 | 4.40E-06 |
| GO:0044422 | C | organelle part                                | 115 | 3385  | 2.30E-07 | 4.60E-06 |
| GO:0044464 | C | cell part                                     | 518 | 22455 | 9.60E-07 | 1.80E-05 |
| GO:0005623 | C | cell                                          | 518 | 22455 | 9.60E-07 | 1.80E-05 |
| GO:0044424 | C | intracellular part                            | 465 | 19957 | 2.10E-05 | 0.00038  |
| GO:0005622 | C | intracellular                                 | 466 | 20042 | 2.80E-05 | 0.00047  |
| GO:0009536 | C | plastid                                       | 121 | 4037  | 4.20E-05 | 0.00068  |
| GO:0030076 | C | light-harvesting complex                      | 6   | 28    | 6.10E-05 | 0.00097  |
| GO:0009507 | C | chloroplast                                   | 118 | 3959  | 6.70E-05 | 0.001    |
| GO:0048046 | C | apoplast                                      | 22  | 406   | 9.30E-05 | 0.0014   |
| GO:0005737 | C | cytoplasm                                     | 302 | 12233 | 0.00015  | 0.0022   |
| GO:0044425 | C | membrane part                                 | 77  | 2448  | 0.00033  | 0.0046   |
| GO:0009523 | C | photosystem II                                | 6   | 46    | 0.00068  | 0.0089   |
| GO:0009570 | C | chloroplast stroma                            | 26  | 603   | 0.00069  | 0.0089   |
| GO:0009532 | C | plastid stroma                                | 27  | 637   | 0.0007   | 0.0089   |

The criterion “ $FDR \leq 0.001$  and the absolute value of  $\log_2\text{Ratio}(L+4/WT) \geq 1$ ” was used as the threshold to judge the significance of gene expression differences. GO enrichment analysis were done using AgriGO (<http://bioinfo.cau.edu.cn/agriGO/>).

Table S4 Differentially expressed key genes involved in plant growth and development between *ZmPTF1* overexpression line (L+4) and WT

| Gene                        | log2 (L+4/WT) | Best-hit- Arabi-name | Arabi-symbol           | Function                                                                                                        |
|-----------------------------|---------------|----------------------|------------------------|-----------------------------------------------------------------------------------------------------------------|
| <b>Transcription factor</b> |               |                      |                        |                                                                                                                 |
| GRMZM2G063522               | 1.26          | AT1G56010.2          | anac021,ANAC022,NAC1   | shoot apical meristem formation,auxin-mediated lateral root formation, stress responses                         |
| AC212859.3_FG008            | 8.01          | AT1G71930.1          | ANAC030,VND7           | xylem formation                                                                                                 |
| GRMZM2G011598               | 1.33          | AT3G04070.1          | anac047,NAC047         | Regulates Flooding-Induced Leaf Movement                                                                        |
| GRMZM2G127379               | 1.99          | AT3G04070.2          | anac047,NAC047         |                                                                                                                 |
| GRMZM2G068973               | 2.28          | AT5G08790.1          | anac081,ATAF2          |                                                                                                                 |
| GRMZM2G123667               | -1.35         | AT5G08790.1          | anac081,ATAF2          | integrates brassinosteroid inactivation and seedling photomorphogenesis                                         |
| GRMZM2G162739               | 1.96          | AT5G08790.1          | anac081,ATAF2          |                                                                                                                 |
| GRMZM2G347043               | 2.07          | AT5G08790.1          | anac081,ATAF2          |                                                                                                                 |
| GRMZM2G106548               | -1.96         | AT5G41920.1          | SCL23                  | bundle sheath cell fate specification                                                                           |
| GRMZM2G069126               | 4.52          | AT4G25470.1          | ATCBF2,CBF2,DREB1C,F   | Stunted growth, darker, less elongated and prostate leaves, delayed flowering.                                  |
| GRMZM2G069146               | 3.08          | AT4G25470.1          | ATCBF2,CBF2,DREB1C,F   |                                                                                                                 |
| GRMZM2G130149               | -1.58         | AT5G59780.3          | ATMYB59,MYB59          | root growth and cell cycle progression                                                                          |
| GRMZM2G001930               | 1.30          | AT1G32640.1          | ATMYC2,JAI1,JIN1,RD22I | Positive regulator of lateral root formation.                                                                   |
| GRMZM2G059562               | 3.17          | AT2G46400.1          | ATWRKY46,WRKY46        | stress-dependent LR inhibition via regulation of ABA signaling and auxin homeostasis.                           |
| GRMZM2G093404               | -2.54         | AT1G03790.1          | SOM                    | SOM negatively regulates light-dependent seed germination downstream of PIL5 (AT2G20180)                        |
| GRMZM2G163813               | 9.63          | AT5G43270.3          | SPL2                   | development of lateral organs in association with shoot maturation in the reproductive phase.                   |
| GRMZM2G465553               | -1.18         | AT2G38560.1          | TFIIS                  | Mutant flower slightly earlier than the wild type and show clearly reduced seed dormancy.                       |
| GRMZM2G181551               | 1.48          | AT2G41430.1          | CID1,ERD15,LSR1        | It acts together with additional CIB1-related proteins to promote CRY2-dependent floral initiation.             |
| GRMZM2G037189               | 1.20          | AT2G41430.4          | CID1,ERD15,LSR1        |                                                                                                                 |
| GRMZM2G025685               | -1.21         | AT1G46264.1          | AT-HSFB4,HSFB4,SCZ     | Functions as a nuclear factor regulating asymmetry of stem cell divisions.                                      |
| <b>Plant hormone</b>        |               |                      |                        |                                                                                                                 |
| GRMZM2G115357               | 2.42          | AT1G04240.1          | IAA3,SHY2              | SHY2/IAA3 regulates multiple auxin responses in roots.                                                          |
| GRMZM2G081158               | -1.18         | AT1G30330.2          | ARF6                   | Acts redundantly with ARF8 to control stamen elongation and flower maturation.                                  |
| GRMZM2G414727               | 1.97          | AT2G46690.1          | SAUR32                 |                                                                                                                 |
| GRMZM2G442000               | -1.44         | AT1G19840.1          | SAUR53                 | SAUR-like auxin-responsive protein family                                                                       |
| GRMZM2G430052               | 1.17          | AT5G50760.1          | SAUR55                 |                                                                                                                 |
| GRMZM2G146108               | 8.51          | AT1G56150.1          | SAUR71                 |                                                                                                                 |
| GRMZM2G446858               | -1.63         | AT4G32810.1          | ATCCD8,CCD8,MAX4       | shoot branching, and light-dependent defects in hook opening and hypocotyl/root elongation.                     |
| GRMZM2G044537               | 3.26          | AT3G61460.1          | BRH1                   |                                                                                                                 |
| GRMZM2G071277               | 3.04          | AT3G61460.1          | BRH1                   | Expression is down regulated by brassinolide.                                                                   |
| GRMZM2G318408               | 1.80          | AT3G61460.1          | BRH1                   |                                                                                                                 |
| GRMZM2G173630               | 1.32          | AT5G27320.1          | ATGID1C,GID1C          | Rosette radius and root length                                                                                  |
| GRMZM2G440543               | 2.24          | AT5G48170.1          | SLY2                   | Promoting growth                                                                                                |
| GRMZM2G045820               | -1.11         | AT1G47056.1          | VFB1                   | Growth and reduced expression of auxin response genes.                                                          |
| GRMZM2G005840               | 3.30          | AT2G04240.2          | XERICO                 | Transcripts levels are induced by DELLA proteins and repressed by gibberellic acid. Involved in ABA metabolism. |
| GRMZM2G022972               | 1.78          | AT1G73805.1          | SARD1                  | Key regulator for ICS1 (Isochorismate Synthase 1) induction and salicylic acid (SA) synthesis.                  |
| GRMZM2G126749               | 2.26          | AT1G73805.1          | SARD1                  |                                                                                                                 |
| GRMZM2G061043               | -1.01         | AT2G45000.1          | EMB2766                | A major negative regulator of auxin signalling. Loss of function mutants are embryo lethal.                     |
| GRMZM2G141031               | -1.68         | AT1G25250.1          | AtIDD16,IDD16          | Regulates auxin biosynthesis and transport and thus aerial organ morphogenesis and gravitropic responses.       |

Table S4

|               |       |             |                       |                                                                                                                                                                                   |
|---------------|-------|-------------|-----------------------|-----------------------------------------------------------------------------------------------------------------------------------------------------------------------------------|
| GRMZM2G153683 | 1.20  | AT5G61210.1 | ATSNAP33,SNAP33,SNP3  | Involved in cytokinesis and cell plate formation                                                                                                                                  |
| GRMZM2G410766 | 1.65  | AT2G39050.1 | EULS3                 | Involved in ABA mediated stomatal movement.                                                                                                                                       |
| GRMZM2G162200 | -2.69 | AT2G39730.2 | RCA                   | Required for the light activation of rubisco. Involved in jasmonate-induced leaf senescence.                                                                                      |
| GRMZM2G325650 | -1.58 | AT1G80440.1 | KFB20                 | Targets type-B ARR proteins for degradation and is involved in the negative regulation of the cytokinin response.                                                                 |
| GRMZM2G445634 | 5.54  | AT1G19180.1 | JAZ1,TIFY10A          | Involved in jasmonate signaling. JAZ1 can interact with the COI1 F-box subunit of an SCF E3 ubiquitin ligase only in the presence of jasmonate-isoleucine (JA-ILE) or coronatine. |
| <b>Others</b> |       |             |                       |                                                                                                                                                                                   |
| GRMZM2G474755 | 5.42  | AT1G24620.1 | CML25                 | Root hairs under phosphate-deficient conditions.                                                                                                                                  |
| GRMZM2G097900 | 3.28  | AT5G37770.1 | CML24,TCH2            | Resistant to ABA inhibition of germination and seedling growth, are defective in long-day induction of flowering.                                                                 |
| GRMZM2G309327 | 1.47  | AT4G20780.1 | CML42                 | trichome branching.                                                                                                                                                               |
| GRMZM2G312661 | 1.22  | AT4G20780.1 | CML42                 | trichome branching.                                                                                                                                                               |
| GRMZM2G173965 | 4.61  | AT5G55090.1 | MAPKKK15              | MAPKKK15, MITOGEN-ACTIVATED PROTEIN KINASE KINASE KINASE 15                                                                                                                       |
| GRMZM2G174896 | 1.64  | AT2G26980.4 | CIPK3,SnRK3.17        | Germination efficiency                                                                                                                                                            |
| GRMZM2G138770 | 2.09  | AT5G40010.1 | AATP1                 | Seed and silique development.                                                                                                                                                     |
| GRMZM2G178645 | 1.89  | AT5G40010.1 | AATP1                 | Seed and silique development.                                                                                                                                                     |
| GRMZM2G010251 | 2.54  | AT1G08090.1 | ACH1,ATNRT2.1,ATNRT   | Lateral root initiation independently of nitrate uptake.                                                                                                                          |
| GRMZM2G437912 | 2.13  | AT1G08090.1 | 2:1,LIN1,NRT2,NRT2.1  | Lateral root initiation independently of nitrate uptake.                                                                                                                          |
| GRMZM2G108976 | 1.49  | AT4G01710.1 | ARPC5,CRK             | Cell expansion of trichome.                                                                                                                                                       |
| GRMZM2G352431 | 1.07  | AT1G77300.1 | ASHH2,CCR1,EFS,SDG8   | Ovule, embryo sac, anther and pollen development.                                                                                                                                 |
| GRMZM2G064159 | 1.07  | AT5G08170.1 | ATAIH,EMB1873         | EMBRYO DEFECTIVE 1873                                                                                                                                                             |
| GRMZM2G028677 | -2.15 | AT2G30490.1 | ATC4H,C4H,CYP73A5,RE  | Phenylpropanoid metabolism, growth and development.                                                                                                                               |
| GRMZM2G436583 | -3.11 | AT2G24610.1 | ATCNGC14,CNGC14       | Tip-Growth in Root Hairs, Root Gravitropism in Arabidopsis thaliana                                                                                                               |
| GRMZM2G436299 | 1.15  | AT3G03050.1 | ATCSLD3,CSLD3,KJK     | mutations initiate root hairs that rupture at their tip soon after initiation.                                                                                                    |
| GRMZM2G048313 | -3.09 | AT1G60950.1 | ATFD2,FED A           | Retarded growth, with thin leaves of a lighter yellowish-green color, and more roundly shape                                                                                      |
| GRMZM2G122327 | -1.66 | AT1G60950.1 | ATFD2,FED A           | Retarded growth, with thin leaves of a lighter yellowish-green color, and more roundly shape                                                                                      |
| GRMZM2G122337 | -1.67 | AT1G60950.1 | ATFD2,FED A           | Retarded growth, with thin leaves of a lighter yellowish-green color, and more roundly shape                                                                                      |
| GRMZM2G059637 | 1.52  | AT3G11430.1 | ATGPAT5,GPAT5         | The mutant seeds have a reduced germination rate under high salt and lower tolerance to salt stress.                                                                              |
| GRMZM5G873519 | -8.58 | AT1G32080.1 | ATLRGB                | Involved in chloroplast development, carbon partitioning and leaf senescence.                                                                                                     |
| GRMZM2G128171 | -1.19 | AT2G47470.1 | ATPD111,ATPDIL2-1,MEE | Reduced seed set due to delayed development of embryo sacs and resulting defect in pollen tube guidance                                                                           |
| GRMZM2G058039 | 1.05  | AT5G53180.1 | ATPTB2,PTB2           | Pollen germination.                                                                                                                                                               |
| GRMZM2G038598 | 1.01  | AT4G23920.1 | ATUGE2,UGE2           | Involved in growth and cell wall carbohydrate biosynthesis.                                                                                                                       |
| GRMZM2G117935 | 2.08  | AT1G17730.1 | CHMP1B,VPS46.1        | CHMP1A and B mediate multivesicular body sorting of auxin carriers and are required for plant development.                                                                        |
| GRMZM5G875502 | 1.23  | AT2G23380.1 | CLF,ICU1,SDG1,SET1    | Involved in the control of leaf morphogenesis.                                                                                                                                    |
| GRMZM2G107199 | -1.11 | AT3G50660.1 | CLM,CYP90B1,DWF4,PSI  | CLM is an epi-allele with small, compressed rosette, reduced internode length, and reduced fertility.                                                                             |
| GRMZM2G056975 | -1.04 | AT5G62790.1 | DXR,PDE129            | DXR knockout or strongly silenced lines have a seedling lethal, albino phenotype.                                                                                                 |
| GRMZM2G382341 | 1.05  | AT5G35700.1 | FIM2                  | Encodes FIMBRIN5, an actin bundling factor required for pollen germination and pollen tube growth.                                                                                |
| GRMZM2G010555 | 2.81  | AT4G22260.1 | IM,IM1                | im mutants have a variegated phenotype and fail to differentiate chloroplasts.                                                                                                    |
| GRMZM2G461447 | -1.11 | AT1G57820.1 | ORTH2,VIM1            | Root growth and flowering.                                                                                                                                                        |
| GRMZM2G098637 | 1.97  | AT5G22000.3 | RHF2A                 | RHF2a may be involved in targetting ICK4KRP6 for degradation following meiosis in order to allow the mitoses associated with megagametogenesis and microgametogenesis to occur.   |
| GRMZM2G001205 | -1.51 | AT5G59820.1 | RHL41,ZAT12           | lines overexpressing this gene exhibits a small but reproducible increase in freeze tolerance.                                                                                    |
| GRMZM2G318860 | 1.07  | AT1G31480.1 | SGR2                  | Abnormal gravitropism in inflorescence stems and hypocotyls.                                                                                                                      |
| GRMZM2G311898 | 1.49  | AT1G28480.1 | GRX480,roxy19         | GRX480 transcription is SA-inducible and requires NPR1. Maybe involved in SA/JA cross-talk.                                                                                       |

The criterion "FDR  $\leq$  0.001 and the absolute value of  $\log_2\text{Ratio}(L+4/WT) \geq 1$ " was used as the threshold to judge the significance of gene expression differences.

Table S4

Table S5 Differentially expressed key genes involved in ABA metabolic and signaling pathway between *ZmPTF1* overexpression line (L+4) and WT

| Gene                                             | log2<br>(L+4/WT) | Best-hit-<br>arabi-name | Arabi-symbol        | Annotation                                                           |
|--------------------------------------------------|------------------|-------------------------|---------------------|----------------------------------------------------------------------|
| <b>abscisic acid metabolic process</b>           |                  |                         |                     |                                                                      |
| GRMZM2G446858                                    | -1.63            | AT4G32810.1             | ATCCD8,CCD8,MAX4    | carotenoid cleavage dioxygenase 8                                    |
| GRMZM2G417954                                    | 8.59             | AT1G78390.1             | ATNCED9,NCED9       | nine-cis-epoxycarotenoid dioxygenase 9                               |
| GRMZM2G014392                                    | 2.63             | AT1G78390.1             | ATNCED9,NCED9       | nine-cis-epoxycarotenoid dioxygenase 9                               |
| GRMZM2G149317                                    | -1.81            | AT5G17230.1             | PSY                 | PHYTOENE SYNTHASE                                                    |
| <b>abscisic acid core signaling pathway</b>      |                  |                         |                     |                                                                      |
| GRMZM2G119370                                    | 8.23             | AT2G26040.1             | PYL2,RCAR14         | PYR1-like 2                                                          |
| GRMZM2G112524                                    | 1.17             | AT2G26040.1             | PYL2, RCAR14        | PYR1-like 2                                                          |
| GRMZM2G057959                                    | -1.90            | AT5G05440.1             | PYL5,RCAR8          | Polyketide cyclase/dehydrase and lipid transport superfamily protein |
| GRMZM2G158328                                    | 9.37             | AT1G66600.1             | ABO3,WRKY63         | ABA overly sensitive mutant 3                                        |
| GRMZM2G174896                                    | 1.64             | AT2G26980.4             | CIPK3,SnRK3.17      | CBL-interacting protein kinase 3                                     |
| GRMZM2G465287                                    | 2.91             | AT2G30020.1             | AP2C1               | Protein phosphatase 2C family protein                                |
| GRMZM2G033413                                    | 1.13             | AT3G19290.1             | ABF4, AREB2         | ABRE binding factor 4                                                |
| GRMZM2G117164                                    | 1.66             | AT5G65310.1             | ATHB-5, ATHB5, HB5  | homeobox protein 5                                                   |
| GRMZM2G117851                                    | 1.74             | AT2G46270.2             | GBF3                | G-box binding factor 3                                               |
| <b>abscisic acid-activated signaling pathway</b> |                  |                         |                     |                                                                      |
| GRMZM2G061568                                    | 1.23             | AT1G15080.1             | ATLPP2,ATPAP2,LPP2  | lipid phosphate phosphatase 2                                        |
| GRMZM2G001930                                    | 1.30             | AT1G32640.1             | ATMYC2,JAI1,RD22BP1 | Basic helix-loop-helix (bHLH) DNA-binding family protein             |
| GRMZM2G394450                                    | 2.13             | AT1G62660.1             |                     | Glycosyl hydrolases family 32 protein                                |
| GRMZM2G005840                                    | 3.30             | AT2G04240.2             | XERICO              | RING/U-box superfamily protein                                       |
| GRMZM2G113860                                    | 8.33             | AT3G19580.1             | AZF2,ZF2            | zinc-finger protein 2                                                |
| GRMZM2G567897                                    | 1.98             | AT3G46620.1             | ATRDUF1             | zinc finger (C3HC4-type RING finger) family protein                  |
| GRMZM2G077809                                    | 1.49             | AT5G14420.1             | RGLG2               | RING domain ligase2                                                  |
| GRMZM2G069082                                    | 11.05            | AT5G51990.1             | CBF4,DREB1D         | C-repeat-binding factor 4                                            |
| GRMZM2G124037                                    | 10.09            | AT5G51990.1             | CBF4,DREB1D         | C-repeat-binding factor 4                                            |
| GRMZM2G364612                                    | 2.31             | AT5G59550.1             | ATRDUF2             | zinc finger (C3HC4-type RING finger) family protein                  |
| GRMZM2G145444                                    | 1.10             | AT5G67300.1             | ATMYB44,MYB44       | myb domain protein r1                                                |
| AC226248.1_FG002                                 | 1.02             | AT1G11050.1             |                     | Protein kinase superfamily protein                                   |
| GRMZM2G445634                                    | 5.54             | AT1G19180.1             | JAZ1,TIFY10A        | jasmonate-zim-domain protein 1                                       |
| GRMZM2G013236                                    | 1.49             | AT1G30270.1             | ATCIPK23,SnRK3.23   | CBL-interacting protein kinase 23                                    |
| GRMZM2G066120                                    | 1.31             | AT4G08500.1             | ATMEKK1,MAPKKK8     | MAPK/ERK kinase kinase 1                                             |
| GRMZM2G080516                                    | 2.04             | AT4G17500.1             | ATERF-1,ERF-1       | ethylene responsive element binding factor 1                         |
| GRMZM2G466044                                    | 1.56             | AT4G17500.1             | ATERF-1,ERF-1       | ethylene responsive element binding factor 1                         |

The criterion “FDR ≤ 0.001 and the absolute value of log2Ratio(L+4/WT) ≥ 1” was used as the threshold to judge the significance of gene expression differences.

Table S6 Differentially expressed key genes between *ZmPTF1* overexpression line (L+4) and WT

| Gene                                          | log2 (L+4/WT) | Best-hit- Arabidopsis | Name in Arabidopsis                           | Function                                                                                                                                                                                                                                                                                             |
|-----------------------------------------------|---------------|-----------------------|-----------------------------------------------|------------------------------------------------------------------------------------------------------------------------------------------------------------------------------------------------------------------------------------------------------------------------------------------------------|
| <b>AP2/DREBP family transcription factors</b> |               |                       |                                               |                                                                                                                                                                                                                                                                                                      |
| GRMZM2G069082                                 | 11.05         | AT5G51990.1           | CBF4,DREB1D (A-1 subfamily)                   | There are six members in this subfamily, including CBF1, CBF2, and CBF3. This gene is involved in response to drought stress and abscisic acid treatment, but not to low temperature.                                                                                                                |
| GRMZM2G124037                                 | 10.09         | AT5G51990.1           |                                               |                                                                                                                                                                                                                                                                                                      |
| GRMZM2G069126                                 | 4.52          | AT4G25470.1           | ATCBF2,DREB1C,FTQ4 (A-1 subfamily)            | This gene is involved in response to low temperature, abscisic acid, etc. Overexpressing CBF2 leads to increased freeze tolerance. May be involved in a negative regulatory/feedback circuit of the CBF pathway.                                                                                     |
| GRMZM2G069146                                 | 3.08          | AT4G25470.1           |                                               |                                                                                                                                                                                                                                                                                                      |
| GRMZM2G061487                                 | 2.22          | AT1G78080.1           | RAP2.4 (A-6 subfamily)                        | Role in mediating light and ethylene signaling.                                                                                                                                                                                                                                                      |
| GRMZM2G113060                                 | 1.21          | AT1G78080.1           |                                               |                                                                                                                                                                                                                                                                                                      |
| GRMZM2G438202                                 | 3.16          | AT3G15210.1           | ATERF-4,ATERF4,RAP2.5(B-1 subfamily)          | Acts as a negative regulator of JA-responsive defense gene expression and resistance to the necrotrophic fungal pathogen <i>Fusarium oxysporum</i> and antagonizes JA inhibition of root elongation.                                                                                                 |
| GRMZM2G020150                                 | 2.67          | AT3G15210.1           |                                               |                                                                                                                                                                                                                                                                                                      |
| GRMZM2G020054                                 | 5.78          | AT3G20310.1           | ATERF-7,ATERF7,ERF7(B-1 subfamily)            | Phosphorylated by PKS3 in vitro. Involved in ABA-mediated responses. Acts as a repressor of GCC box-mediated transcription together with AtSin3 and HDA19.                                                                                                                                           |
| GRMZM2G068967                                 | 3.88          | AT3G20310.1           |                                               |                                                                                                                                                                                                                                                                                                      |
| GRMZM2G089995                                 | 3.62          | AT3G20310.1           |                                               |                                                                                                                                                                                                                                                                                                      |
| GRMZM2G174347                                 | 3.09          | AT5G44210.1           | ATERF-9,ATERF9,ERF9(B-1 subfamily)            | here are 15 members in this subfamily including ATERF-3, ATERF-4, ATERF-7, and leafy petiole.                                                                                                                                                                                                        |
| GRMZM2G310368                                 | 2.50          | AT5G44210.1           |                                               |                                                                                                                                                                                                                                                                                                      |
| GRMZM2G132185                                 | 1.32          | AT5G44210.1           |                                               |                                                                                                                                                                                                                                                                                                      |
| GRMZM2G369472                                 | 10.30         | AT3G16770.1           | ATEBP,EBP,ERF72,RAP2.3 (B-2 subfamily)        | Acts as a transcriptional activator through the GCC-box. It was a suppressor of Bax-induced cell death. Confers resistance to H <sub>2</sub> O <sub>2</sub> and heat stresses. It is part of the ethylene signaling pathway and is predicted to act downstream of EIN2 and CTR1, but not under EIN3. |
| GRMZM2G173771                                 | 8.23          | AT3G16770.1           |                                               |                                                                                                                                                                                                                                                                                                      |
| GRMZM2G080516                                 | 2.04          | AT4G17500.1           | ATERF-1,ERF-1(B-3 subfamily)                  | There are 18 members in this subfamily including ATERF-1, ATERF-2, AND ATERF-5.                                                                                                                                                                                                                      |
| GRMZM2G466044                                 | 1.56          | AT4G17500.1           |                                               |                                                                                                                                                                                                                                                                                                      |
| <b>WRKY family transcription factors</b>      |               |                       |                                               |                                                                                                                                                                                                                                                                                                      |
| GRMZM2G012724                                 | 3.15          | AT2G38470.1           | ATWRKY33,WRKY33 (group I)                     | Regulates the antagonistic relationship between defense pathways mediating responses to <i>P. syringae</i> and necrotrophic fungal pathogens. Located in nucleus. Involved in response to various abiotic stresses.                                                                                  |
| GRMZM2G148087                                 | 1.74          | AT2G38470.1           |                                               |                                                                                                                                                                                                                                                                                                      |
| GRMZM2G120320                                 | 3.17          | AT1G80840.1           | ATWRKY40,WRKY40 (Group IIc)                   | Forms complexes with itself, WRKY40 and 60. Coexpression made plants more susceptible to biotic stress.                                                                                                                                                                                              |
| GRMZM2G176489                                 | 1.93          | AT5G15130.1           | ATWRKY72,WRKY72(Group IIb)                    | WRKY72-type transcription factors contribute to basal immunity in tomato and Arabidopsis.                                                                                                                                                                                                            |
| GRMZM2G083350                                 | 1.25          | AT5G15130.1           |                                               |                                                                                                                                                                                                                                                                                                      |
| GRMZM5G863420                                 | 1.02          | AT5G64810.1           | ATWRKY51,WRKY51 (Group IIc)                   | Involved in jasmonic acid inducible defense responses.                                                                                                                                                                                                                                               |
| GRMZM2G401521                                 | 2.12          | AT1G64000.1           | ATWRKY56,WRKY56(Group IIc Group II-c WRKY TF. |                                                                                                                                                                                                                                                                                                      |
| GRMZM2G143204                                 | 1.36          | AT1G69310.2           | ATWRKY57,WRKY57(Group IIc)                    | Activation of WRKY57 confers drought tolerance.                                                                                                                                                                                                                                                      |
| GRMZM2G148561                                 | 1.12          | AT4G31550.2           | ATWRKY11,WRKY11 (Group IIc)                   | Negative regulator of basal resistance to <i>Pseudomonas syringae</i> .                                                                                                                                                                                                                              |
| GRMZM2G324999                                 | 2.00          | AT4G11070.1           | AtWRKY41,WRKY41(Group III)                    | WRKY41 controls Arabidopsis seed dormancy via direct regulation of ABI3 transcript levels.                                                                                                                                                                                                           |
| GRMZM2G059562                                 | 3.17          | AT2G46400.1           | ATWRKY46,WRKY46(Group III)                    | Feedforward inhibition of osmotic/salt stress-dependent LR inhibition via regulation of ABA and auxin signalling.                                                                                                                                                                                    |
| GRMZM2G158328                                 | 9.37          | AT1G66600.1           | ABO3,WRKY63(Group III)                        | Involved in the regulation of plant responses to ABA and drought stress                                                                                                                                                                                                                              |
| <b>NAC family transcription factors</b>       |               |                       |                                               |                                                                                                                                                                                                                                                                                                      |
| GRMZM2G014653                                 | 1.12          | AT1G01720.1           | ANAC002,ATAF1                                 | Transcript level increases in response to wounding and ABA. ATAF1 attenuates ABA signaling and synthesis.                                                                                                                                                                                            |
| AC196475.3_FG005                              | 1.67          | AT1G33060.2           | ANAC014,NAC014                                | NAC domains transcription factor NAC014                                                                                                                                                                                                                                                              |
| GRMZM2G063522                                 | 1.26          | AT1G56010.2           | anac021,ANAC022,NAC1                          | Involved in shoot apical meristem formation and auxin-mediated lateral root formation and stress responses.                                                                                                                                                                                          |
| GRMZM2G146380                                 | 2.25          | AT3G04060.1           | anac046,NAC046                                | Mutants in NAC046 have delayed senescence and increased CHL content.                                                                                                                                                                                                                                 |

Table S6

|                                          |       |             |                     |                                                                                                                                                                                                                              |
|------------------------------------------|-------|-------------|---------------------|------------------------------------------------------------------------------------------------------------------------------------------------------------------------------------------------------------------------------|
| GRMZM2G127379                            | 1.99  | AT3G04070.2 | anac047,NAC047      | NAC Transcription Factor SPEEDY HYPONASTIC GROWTH Regulates Flooding-Induced Leaf Movement in Arabidopsis                                                                                                                    |
| GRMZM2G011598                            | 1.33  | AT3G04070.1 |                     |                                                                                                                                                                                                                              |
| AC212859.3_FG006                         | 8.01  | AT1G71930.1 | ANAC030,VND7        | Involved in xylem formation. Induces transdifferentiation of various cells into protoxylem vessel elements.                                                                                                                  |
| GRMZM2G068973                            | 2.28  | AT5G08790.1 |                     |                                                                                                                                                                                                                              |
| GRMZM2G347043                            | 2.07  | AT5G08790.1 | anac081,ATAF2       | Induced by wounding, belongs to a large family of putative transcriptional activators with NAC domain.ATAF2 integrates Arabidopsis brassinosteroid inactivation and seedling photomorphogenesis                              |
| GRMZM2G162739                            | 1.96  | AT5G08790.1 |                     |                                                                                                                                                                                                                              |
| GRMZM2G123667                            | -1.35 | AT5G08790.1 |                     |                                                                                                                                                                                                                              |
| <b>MYB family transcription factors</b>  |       |             |                     |                                                                                                                                                                                                                              |
| GRMZM2G145444                            | 1.10  | AT5G67300.1 | ATMYB44,MYBR1       | Involved in mediating plant responses to a variety of abiotic stimuli.                                                                                                                                                       |
| GRMZM2G127857                            | 5.75  | AT3G23250.1 | ATMYB15,ATY19,MYB15 | SG2-type R2R3-MYB transcription factor MYB15 controls defense-induced lignification and basal immunity in Arabidopsis                                                                                                        |
| GRMZM2G095904                            | 4.55  | AT3G23250.1 |                     |                                                                                                                                                                                                                              |
| GRMZM2G084583                            | -1.76 | AT4G38620.1 | ATMYB4,MYB4         | A R2R3 MYB protein which is involved in the response to UV-B and a repressor of target gene expression.                                                                                                                      |
| GRMZM2G130149                            | -1.58 | AT5G59780.3 | ATMYB59,MYB59       | AtMYB59 regulates root growth and cell cycle progression in Arabidopsis                                                                                                                                                      |
| GRMZM2G078820                            | 1.85  | AT2G23290.1 | AtMYB70,MYB70       | Member of the R2R3 factor gene family.                                                                                                                                                                                       |
| <b>bHLH family transcription factors</b> |       |             |                     |                                                                                                                                                                                                                              |
| GRMZM2G301089                            | 5.11  | AT5G43650.1 | BHLH92              | bHLH92 functions in plant responses to osmotic stresses                                                                                                                                                                      |
| GRMZM2G001930                            | 1.30  | AT1G32640.1 | ATMYC2,RD22BP1,ZBF1 | MYC-related transcriptional activator. Binds to an extended G-Box promoter motif and interacts with Jasmonate ZIM-domain proteins. Interacts with EIN3 and EIL1 to repress hook curvature and resistance to Botrytis cinera. |
| GRMZM2G133675                            | 1.23  | AT3G47640.2 | PYE                 | Encodes POPEYE, a bHLH transcription factor regulating response to iron deficiency in Arabidopsis roots.                                                                                                                     |
| GRMZM2G082343                            | 2.07  | AT4G37850.1 |                     | basic helix-loop-helix (bHLH) DNA-binding superfamily protein                                                                                                                                                                |
| GRMZM2G006631                            | -1.09 | AT1G72210.1 | BHLH96              | basic helix-loop-helix (bHLH) DNA-binding superfamily protein                                                                                                                                                                |
| GRMZM2G101350                            | 1.70  | AT4G34530.1 | CIB1                | CIB1 interacts with CRY2 (cryptochrome 2) in a blue light-specific manner, CIB1 positively regulates FT expression.                                                                                                          |
| <b>other transcription factor</b>        |       |             |                     |                                                                                                                                                                                                                              |
| GRMZM2G060216                            | 1.83  | AT1G08320.3 | bZIP21,TGA9         | Involved in ROS-mediated responses to bacterial PAMP flg22                                                                                                                                                                   |
| GRMZM2G131961                            | 1.51  | AT5G65210.2 | TGA1                | A redox-controlled regulator of systemic acquired resistance. TGA1 targets the as-1 element of defense proteins genes                                                                                                        |
| GRMZM2G033413                            | 1.13  | AT3G19290.1 | ABF4,AREB2          | Mediates ABA-dependent stress responses.ABF4 acts through SnRK2 pathway and binds to ABA response elements.                                                                                                                  |
| GRMZM2G139872                            | 1.59  | AT5G27920.1 |                     | F-box family protein                                                                                                                                                                                                         |
| GRMZM2G440543                            | 2.24  | AT5G48170.1 | SLY2                | Overexpression of SLY2 can partially compensate sly1-10 mutant phenotype of dwarfism.                                                                                                                                        |
| GRMZM2G138967                            | -1.33 | AT4G16141.1 | ATGATA17L           | GATA type zinc finger transcription factor family protein;(source:Araport11)                                                                                                                                                 |
| GRMZM2G163427                            | 1.56  | AT2G37650.1 |                     | GRAS family transcription factor                                                                                                                                                                                             |
| GRMZM2G001205                            | -1.51 | AT5G59820.1 | RHL41,ZAT12         | Overexpression of this putative transcription factor exhibits a small but reproducible increase in freeze tolerance.                                                                                                         |
| GRMZM2G002805                            | 9.55  | AT2G28200.1 |                     | C2H2-type zinc finger family protein                                                                                                                                                                                         |
| GRMZM2G361210                            | 4.24  | AT3G46080.1 |                     | C2H2-type zinc finger family protein                                                                                                                                                                                         |
| GRMZM2G117851                            | 1.74  | AT2G46270.2 | GBF3                | Induced by ABA. It has been shown to bind to ABA that contains the G-box and is induced by cold and water deprivation                                                                                                        |
| GRMZM2G366532                            | 8.01  | AT5G02500.1 | AT-HSC70-1,HSP70-1  | Important for stomatal closure and modulate abscisic acid-dependent physiological responses in Arabidopsis                                                                                                                   |
| <b>mitogen-activated protein kinase</b>  |       |             |                     |                                                                                                                                                                                                                              |
| GRMZM2G131334                            | -1.10 | AT2G42880.1 | ATMPK20,MPK20       | MAP kinase 20                                                                                                                                                                                                                |
| GRMZM2G173965                            | 4.61  | AT5G55090.1 | MAPKKK15            | mitogen-activated protein kinase kinase kinase 15                                                                                                                                                                            |
| GRMZM2G041774                            | 4.01  | AT4G26890.1 | MAPKKK16            | mitogen-activated protein kinase kinase kinase 16                                                                                                                                                                            |
| GRMZM2G476477                            | 1.68  | AT2G32510.1 | MAPKKK17            | mitogen-activated protein kinase kinase kinase 17                                                                                                                                                                            |
| GRMZM2G156800                            | 1.05  | AT5G66850.1 | MAPKKK5             | mitogen-activated protein kinase kinase kinase 5                                                                                                                                                                             |

Table S6



| <b>VQ motif-containing protein</b>  |       |             |                             |                                                                                                                                                                                                                                                                                                      |
|-------------------------------------|-------|-------------|-----------------------------|------------------------------------------------------------------------------------------------------------------------------------------------------------------------------------------------------------------------------------------------------------------------------------------------------|
| GRMZM2G174558                       | 1.26  | AT1G28280.1 | MPK3/6-TARGETED VQP 1       | MPK3/6-TARGETED VQP 1                                                                                                                                                                                                                                                                                |
| GRMZM2G118172                       | 3.45  | AT4G37710.1 | VQ12                        | Arabidopsis VQ-motif-containing Protein 29 Represses Seedling De-etiolation by Interacting with PIF1                                                                                                                                                                                                 |
| GRMZM2G333049                       | 3.01  | AT4G39720.1 | VQ motif-containing protein | VQ motif-containing protein                                                                                                                                                                                                                                                                          |
| GRMZM2G420715                       | 2.06  | AT4G39720.1 | VQ motif-containing protein | VQ motif-containing protein                                                                                                                                                                                                                                                                          |
| <b>jasmonate-zim-domain protein</b> |       |             |                             |                                                                                                                                                                                                                                                                                                      |
| GRMZM2G445634                       | 5.54  | AT1G19180.1 | JAZ1,TIFY10A                | JAZ 1 is a nuclear-localized protein involved in jasmonate signaling. JAZ 1 can interact with the CO11 F-box subunit of an SCF E3 ubiquitin ligase in a yeast-two-hybrid assay only in the presence of jasmonate-isoleucine (JA-ILE) or coronatine                                                   |
| GRMZM2G036351                       | 6.00  | AT1G74950.1 | JAZ2,TIFY10B                | TIFY domain/Divergent CCT motif family protein                                                                                                                                                                                                                                                       |
| GRMZM2G343157                       | 8.74  | AT3G43440.1 | JAZ11,TIFY3A                |                                                                                                                                                                                                                                                                                                      |
| GRMZM2G145458                       | 5.76  | AT3G43440.1 | JAZ11,TIFY3A                | Jasmonate-zim-domain protein 11                                                                                                                                                                                                                                                                      |
| GRMZM2G145412                       | 5.01  | AT3G43440.1 | JAZ11,TIFY3A                |                                                                                                                                                                                                                                                                                                      |
| <b>Auxin signaling pathway</b>      |       |             |                             |                                                                                                                                                                                                                                                                                                      |
| GRMZM2G115357                       | 2.42  | AT1G04240.1 | IAA3,SHY2                   | SHY2/IAA3 regulates auxin responses. It is induced rapidly by IAA, and phosphorylated by oat phytochrome A in vitro.                                                                                                                                                                                 |
| GRMZM2G081158                       | -1.18 | AT1G30330.2 | ARF6                        | Mediates auxin response. Acts redundantly with ARF8 to control stamen elongation and flower maturation.                                                                                                                                                                                              |
| GRMZM2G442000                       | -1.44 | AT1G19840.1 | SAUR53                      | SAUR-like auxin-responsive protein family                                                                                                                                                                                                                                                            |
| GRMZM2G414727                       | 1.97  | AT2G46690.1 | SAUR32                      | SAUR-like auxin-responsive protein family                                                                                                                                                                                                                                                            |
| GRMZM2G430052                       | 1.17  | AT5G50760.1 | SAUR55                      | SAUR-like auxin-responsive protein family                                                                                                                                                                                                                                                            |
| GRMZM2G146108                       | 8.51  | AT1G56150.1 | SAUR71                      | SAUR-like auxin-responsive protein family                                                                                                                                                                                                                                                            |
| <b>response to phosphate, salt</b>  |       |             |                             |                                                                                                                                                                                                                                                                                                      |
| GRMZM2G112377                       | 1.82  | AT3G54700.1 | PHT1;7                      | Encodes Pht1;7, a member of the Pht1 family of phosphate transporters.                                                                                                                                                                                                                               |
| GRMZM2G070087                       | -1.53 | AT3G54700.1 | PHT1;7                      |                                                                                                                                                                                                                                                                                                      |
| GRMZM2G009045                       | 2.11  | AT5G14040.1 | PHT3;1                      | Encodes a mitochondrial phosphate transporter. Modulates plant responses to salt stress.                                                                                                                                                                                                             |
| GRMZM2G073860                       | 1.57  | AT2G16430.2 | ATPAP10,PAP10               | A major root-associated acid phosphatase, is regulated by local and systemic phosphate signals.                                                                                                                                                                                                      |
| GRMZM2G097704                       | 3.72  | AT4G16820.1 | PLA-I[ $\beta$ ]2           | Encodes a lipase that hydrolyzes phosphatidylcholine, glycolipids as well as triacylglycerols.                                                                                                                                                                                                       |
| GRMZM2G106026                       | 9.12  | AT1G27730.1 | STZ,ZAT10                   | Salt tolerance zinc finger. Salt tolerance produced by ZAT10 appeared to be partially dependent on ENA1/PMR2, a P-type ATPase required for Li <sup>+</sup> and Na <sup>+</sup> efflux in yeast. Acts as a transcriptional repressor and is responsive to chitin oligomers and photooxidative stress. |
| GRMZM2G400714                       | 3.00  | AT1G27730.1 | STZ,ZAT10                   |                                                                                                                                                                                                                                                                                                      |
| GRMZM2G035103                       | 2.78  | AT1G27730.1 | STZ,ZAT10                   |                                                                                                                                                                                                                                                                                                      |

The criterion "FDR  $\leq$  0.001 and the absolute value of  $\log_2\text{Ratio}(L+4/WT) \geq 1$ " was used as the threshold to judge the significance of gene expression differences.

Table S6

Table S8 Real-time RT-PCR to validate the results in the RNAseq analysis in *ZmPTF1* overexpression lines L+3, L+4 and WT

| ID_maize         | Name                    | L+4/WT (DGE) | L+3/WT (qPCR) | L+4/WT (qPCR) | Forward primer (5' to 3') | Reverse primer (5' to 3') |
|------------------|-------------------------|--------------|---------------|---------------|---------------------------|---------------------------|
| GRMZM2G442000    | SAUR53                  | 0.37         | 0.25±0.02     | 0.34±0.03     | CAGGCGGAGGAGGAGTACGGGTTC  | CGCTCTGGAGGTCGTCGAGGGT    |
| GRMZM2G130149    | ATMYB59,ATMYB59-1,A     | 0.34         | 0.40±0.03     | 0.27±0.02     | GATTTTCATTGCCAAAGTATCAGG  | TGGTAAGTCAGCGAAGACGAG     |
| GRMZM2G081158    | ARF6                    | 0.44         | 0.41±0.03     | 0.36±0.04     | AGATTCGGCAGCTACTACGA      | TATGCACCTACGCTATTCA       |
| GRMZM2G461447    | ORTH2,VIM1              | 0.46         | 0.41±0.03     | 0.36±0.04     | TGCCCTACTGACATCTGCGACTT   | GCACCTCCATTTCAACCAC       |
| GRMZM2G033413    | ABF4,AREB2              | 2.19         | 2.44±0.12     | 3.13±0.32     | TGGAGCGTATCAACAGCCAACA    | CGCAGACTACCCACGTCACAGA    |
| GRMZM2G430052    | SAUR55                  | 2.26         | 2.61±0.13     | 5.62±0.25     | TCGTGGTGGGACGGAGTGC       | TACGCGGAGTGGCCCCGGACAAG   |
| GRMZM2G001930    | ATMYC2,JAI1,JIN1,MYC2   | 2.47         | 2.61±0.24     | 5.24±0.11     | CGCCGTTCTTCAAGCCCGAGTC    | CGGGTGGTGGTTGGTGTGCTC     |
| AC212859.3_FG008 | ANAC030,VND7            | 257.00       | 234.51±5.67   | 245.21±7.91   | CGGCTACTACGACCACAACCTC    | CAGCGGGGGATACTCAACA       |
| GRMZM2G063522    | anac021,ANAC022,NAC1    | 2.39         | 3.52±0.63     | 7.14±0.54     | GTGGTGGTGAGCATCTACGG      | CGGCTATTGGACGGTCTTT       |
| GRMZM2G414727    | SAUR32                  | 3.91         | 3.62±0.30     | 4.44±0.44     | CCCAAGGGGTGCGTGACGGT      | CGGCAGGTGGAGGTGGTGCT      |
| GRMZM2G162739    | anac081,ATAF2           | 3.89         | 3.62±0.72     | 6.27±0.62     | CAGGTTGGATGACTGGGTGCTCTG  | GCCCAAGTCTCCACCTCCTCCTT   |
| GRMZM2G146108    | SAUR71                  | 364.00       | 381±11.21     | 404±12.43     | GGCTTGGACGAAGAGGAAGACTGG  | GATCCCGCATCTGTGCATAGCG    |
| GRMZM2G347043    | anac081,ATAF2           | 4.20         | 4.19±0.23     | 3.96±0.24     | CTTAGGTTGGATGACTGGGTGCTG  | GATTGGGAGTGGGAGTGC GTGT   |
| GRMZM2G009045    | PHT3;1                  | 4.32         | 5.51±0.13     | 6.17±0.52     | CTCTTTGGGGGCGACAGATT      | CGACCATCAGGATGCGAAGA      |
| GRMZM2G045820    | VFB1                    | 0.46         | 5.62±0.32     | 6.24±0.41     | GTGGCATCCTCACCAGAACTCC    | CCAGATTGGCACAGGCAGAAA     |
| GRMZM2G115357    | IAA3,SHY2               | 5.34         | 5.62±0.32     | 6.24±0.41     | CCTCCCAAGGCGCAAGTGGT      | TCGTAGGCGATGGCGTGCTG      |
| GRMZM2G059562    | ATWRKY46,WRKY46         | 9.03         | 6.32±0.12     | 10.21±0.14    | CGCACAAGGACCAGGGATGCA     | ACTGAGACCGCCGAAGTCAAAGC   |
| GRMZM2G010251    | ACH1,ATNRT2.1,ATNRT2    | 5.82         | 7.40±0.73     | 8.63±0.34     | CGGAGCACAAGGCGAAGAGC      | GATGAGCGACATGCAGAACACG    |
| GRMZM2G068973    | anac081,ATAF2           | 4.85         | 7.62±0.51     | 4.04±0.11     | GCAAGTACCCAAACGGCTCG      | GCACAACCCCACTCATCCAAC     |
| GRMZM2G012724    | ATWRKY33,WRKY33         | 8.88         | 9.01±1.01     | 10.4±1.42     | GCCGTGTGTTTCTGTGTTT       | GATGTCGCTCAGCGTCTGTA      |
| GRMZM2G014392    | ATNCED9,NCED9           | 6.19         | 7.19±0.21     | 6.76±0.22     | CGGAGGAGGAACAGAGGAGCCA    | GCAACCAAGATCCCAGACACCC    |
| GRMZM2G052948    | Protein kinase          | 0.36         | 0.32±0.13     | 2.17±0.12     | ATTGTGCTGGTGGTTCTGTT      | CCTCTGTAGGATGATTTGGGTC    |
| GRMZM2G057506    | unknown protein         | 1241.00      | 1500.62±13.42 | 1702.25±15.33 | CAGCAAAATGCTGCAAAGCG      | CCCCACTACACCAAGAGACG      |
| GRMZM2G057959    | PYL5,RCAR8              | 0.27         | 0.62±0.02     | 0.24±0.11     | GCACCGGCTCCAGAACTACCT     | CATCCCTGATCCCTCCTCCC      |
| GRMZM2G069082    | CBF4,DREB1D             | 2119.00      | 1897.34±15.12 | 2433.43±20.14 | CAGACTCAGCTCAATCCCGA      | TTCTTGGGACCAGAGCAGCA      |
| GRMZM2G112377    | PHT1;7                  | 3.54         | 3.40±0.33     | 5.33±0.44     | TCCTTCGGGTTCTGTACTT       | GCACTGTGCGGTTGTTGTAG      |
| GRMZM2G123667    | anac081,ATAF2           | 0.39         | 0.62±0.01     | 0.14±0.02     | GAAGAACCCGCGTGCCAGTG      | ACGGCGTCTCCAGGTCGTCGA     |
| GRMZM2G124037    | CBF4,DREB1D             | 1091.00      | 1381±15.20    | 1404±19.47    | CACCTCCCACAAAACACAC       | GCTGTGACTGTGACCCTGAC      |
| GRMZM2G129375    | ATCNGC1,CNGC1           | 2.34         | 5.19±0.13     | 3.85±0.28     | ACGACGAATGGTGGAAAGAAC     | CTGCGAGTAGAACCTGAAAGTG    |
| GRMZM2G369472    | ATEBP,EBP,ERF72,RAP2.1  | 1263.00      | 1475.51±16.13 | 1456.17±21.52 | CACGTTTACTTTGCGCTGCT      | GGCTGTAGCGATCTGTGTGT      |
| GRMZM2G417954    | ATNCED9,NCED9           | 385.00       | 400.60±8.32   | 456.22±10.41  | TGTCGTGTCCAAGCCGTTCT      | CGGGATGATGGCGTGGTTCT      |
| GRMZM2G436299    | ATCSLD3,CSLD3,KJK       | 2.21         | 2.62±0.12     | 4.24±0.31     | TTGTGGCAGAAGCGATCAGTG     | CCTTTGGAGCACCTTCATCTTG    |
| GRMZM2G436583    | ATCNGC14,CNGC14         | 0.12         | 0.09±0.02     | 0.21±0.04     | GAGCACAGAGGGCACATACATT    | GGTGGACAGTGGCAGGTTGA      |
| GRMZM2G474194    | ATEXPB2,ATHEXP BETA 1   | 0.48         | 0.40±0.03     | 0.63±0.01     | AGCAGCAAGAGCCAAGCAA       | CGTCATCGCCGAGAAAGGTG      |
| GRMZM2G474755    | calcium-binding protein | 42.80        | 36.62±0.71    | 4.84±3.11     | CCAGGCTTGTGCTCCTCGTCTC    | CGAACTCGGGCAGGCTGATGT     |

Table S8
